# Supplementary material for: Accelerometry and physical activity questionnaires - a systematic review
Source: BMC Public Health. 2016 Jun 16;16:515. doi: 10.1186/s12889-016-3172-0 (PMC4910242; doi:10.1186/s12889-016-3172-0)
Supplement: Additional file 2: — Summary of correlations of physical activity data assessed by questionnaires and accelerometers with respect to BMI. (PDF 183 kb) [file 12889_2016_3172_MOESM2_ESM.pdf]

**Additional File 2. Summary of correlations of physical activity data assessed by questionnaires and accelerometers with respect to BMI**

| Study             | Journal                                                      | No. of Participants                                                        | Accelerometer used                                                        | Accelerometer wear method                                                                                                                           | Questionnaire used in investigation                                                                                                                                                                                         | Results                                                                                                                                                                                                                                                                                                                                                                                                                                                                                                                                                                                                                                                                                                                                                                                                                                                                                                                                                                                                                                                                                                                |  |            |              |         |                 |                 |         |         |                |         |                |         |  |            |              |         |                 |         |         |                |         |         |                |         |  |            |              |         |         |         |         |          |                 |         |                |                 |
|-------------------|--------------------------------------------------------------|----------------------------------------------------------------------------|---------------------------------------------------------------------------|-----------------------------------------------------------------------------------------------------------------------------------------------------|-----------------------------------------------------------------------------------------------------------------------------------------------------------------------------------------------------------------------------|------------------------------------------------------------------------------------------------------------------------------------------------------------------------------------------------------------------------------------------------------------------------------------------------------------------------------------------------------------------------------------------------------------------------------------------------------------------------------------------------------------------------------------------------------------------------------------------------------------------------------------------------------------------------------------------------------------------------------------------------------------------------------------------------------------------------------------------------------------------------------------------------------------------------------------------------------------------------------------------------------------------------------------------------------------------------------------------------------------------------|--|------------|--------------|---------|-----------------|-----------------|---------|---------|----------------|---------|----------------|---------|--|------------|--------------|---------|-----------------|---------|---------|----------------|---------|---------|----------------|---------|--|------------|--------------|---------|---------|---------|---------|----------|-----------------|---------|----------------|-----------------|
| Timperio, 2003    | J Sci Med Sport. 2003 Dec; 6(4):477-91.                      | n= 144<br>n= 122 (for validation data)<br>18+ years                        | MTI/CSA accelerometer (model 7164)                                        | 7 consecutive days, during waking hours, attached with adjustable belt, on right hip, 1 minute epochs                                               | One week recall PAQ, assesses frequency and duration of walking, other moderate intensity activity and vigorous intensity activity, questionnaire administered twice -> 3 days apart, again after accelerometer measurement | Spearman correlation<br><b>Correlation PAQ (min/day) vs. Accelerometer (min/day)</b><br><u>PAQ (duration of ≥3.0 METs) vs. Acc:</u><br><table><tr><td></td><td><u>men</u></td><td><u>women</u></td></tr><tr><td>overall</td><td>ρ= 0.29 p &lt;0.05</td><td>ρ= 0.25 p &lt;0.05</td></tr><tr><td>BMI ≤25</td><td>ρ= 0.26</td><td>ρ= 0.39 p&lt;0.01</td></tr><tr><td>BMI &gt;25</td><td>ρ= 0.36 p&lt;0.05</td><td>ρ= 0.09</td></tr></table> <u>PAQ (duration of 3.0-5.9 METs) vs. Acc:</u><br><table><tr><td></td><td><u>men</u></td><td><u>women</u></td></tr><tr><td>overall</td><td>ρ= 0.40 p &lt;0.01</td><td>ρ= 0.19</td></tr><tr><td>BMI ≤25</td><td>ρ= 0.37 p&lt;0.05</td><td>ρ= 0.19</td></tr><tr><td>BMI &gt;25</td><td>ρ= 0.39 p&lt;0.05</td><td>ρ= 0.24</td></tr></table> <u>PAQ (duration of 6.0+ METs) vs. Acc:</u><br><table><tr><td></td><td><u>men</u></td><td><u>women</u></td></tr><tr><td>overall</td><td>ρ= 0.19</td><td>ρ= 0.10</td></tr><tr><td>BMI ≤25</td><td>ρ= -0.06</td><td>ρ= 0.52 p≤0.001</td></tr><tr><td>BMI &gt;25</td><td>ρ= 0.40 p&lt;0.05</td><td>ρ= -0.36 p&lt;0.05</td></tr></table> |  | <u>men</u> | <u>women</u> | overall | ρ= 0.29 p <0.05 | ρ= 0.25 p <0.05 | BMI ≤25 | ρ= 0.26 | ρ= 0.39 p<0.01 | BMI >25 | ρ= 0.36 p<0.05 | ρ= 0.09 |  | <u>men</u> | <u>women</u> | overall | ρ= 0.40 p <0.01 | ρ= 0.19 | BMI ≤25 | ρ= 0.37 p<0.05 | ρ= 0.19 | BMI >25 | ρ= 0.39 p<0.05 | ρ= 0.24 |  | <u>men</u> | <u>women</u> | overall | ρ= 0.19 | ρ= 0.10 | BMI ≤25 | ρ= -0.06 | ρ= 0.52 p≤0.001 | BMI >25 | ρ= 0.40 p<0.05 | ρ= -0.36 p<0.05 |
|                   | <u>men</u>                                                   | <u>women</u>                                                               |                                                                           |                                                                                                                                                     |                                                                                                                                                                                                                             |                                                                                                                                                                                                                                                                                                                                                                                                                                                                                                                                                                                                                                                                                                                                                                                                                                                                                                                                                                                                                                                                                                                        |  |            |              |         |                 |                 |         |         |                |         |                |         |  |            |              |         |                 |         |         |                |         |         |                |         |  |            |              |         |         |         |         |          |                 |         |                |                 |
| overall           | ρ= 0.29 p <0.05                                              | ρ= 0.25 p <0.05                                                            |                                                                           |                                                                                                                                                     |                                                                                                                                                                                                                             |                                                                                                                                                                                                                                                                                                                                                                                                                                                                                                                                                                                                                                                                                                                                                                                                                                                                                                                                                                                                                                                                                                                        |  |            |              |         |                 |                 |         |         |                |         |                |         |  |            |              |         |                 |         |         |                |         |         |                |         |  |            |              |         |         |         |         |          |                 |         |                |                 |
| BMI ≤25           | ρ= 0.26                                                      | ρ= 0.39 p<0.01                                                             |                                                                           |                                                                                                                                                     |                                                                                                                                                                                                                             |                                                                                                                                                                                                                                                                                                                                                                                                                                                                                                                                                                                                                                                                                                                                                                                                                                                                                                                                                                                                                                                                                                                        |  |            |              |         |                 |                 |         |         |                |         |                |         |  |            |              |         |                 |         |         |                |         |         |                |         |  |            |              |         |         |         |         |          |                 |         |                |                 |
| BMI >25           | ρ= 0.36 p<0.05                                               | ρ= 0.09                                                                    |                                                                           |                                                                                                                                                     |                                                                                                                                                                                                                             |                                                                                                                                                                                                                                                                                                                                                                                                                                                                                                                                                                                                                                                                                                                                                                                                                                                                                                                                                                                                                                                                                                                        |  |            |              |         |                 |                 |         |         |                |         |                |         |  |            |              |         |                 |         |         |                |         |         |                |         |  |            |              |         |         |         |         |          |                 |         |                |                 |
|                   | <u>men</u>                                                   | <u>women</u>                                                               |                                                                           |                                                                                                                                                     |                                                                                                                                                                                                                             |                                                                                                                                                                                                                                                                                                                                                                                                                                                                                                                                                                                                                                                                                                                                                                                                                                                                                                                                                                                                                                                                                                                        |  |            |              |         |                 |                 |         |         |                |         |                |         |  |            |              |         |                 |         |         |                |         |         |                |         |  |            |              |         |         |         |         |          |                 |         |                |                 |
| overall           | ρ= 0.40 p <0.01                                              | ρ= 0.19                                                                    |                                                                           |                                                                                                                                                     |                                                                                                                                                                                                                             |                                                                                                                                                                                                                                                                                                                                                                                                                                                                                                                                                                                                                                                                                                                                                                                                                                                                                                                                                                                                                                                                                                                        |  |            |              |         |                 |                 |         |         |                |         |                |         |  |            |              |         |                 |         |         |                |         |         |                |         |  |            |              |         |         |         |         |          |                 |         |                |                 |
| BMI ≤25           | ρ= 0.37 p<0.05                                               | ρ= 0.19                                                                    |                                                                           |                                                                                                                                                     |                                                                                                                                                                                                                             |                                                                                                                                                                                                                                                                                                                                                                                                                                                                                                                                                                                                                                                                                                                                                                                                                                                                                                                                                                                                                                                                                                                        |  |            |              |         |                 |                 |         |         |                |         |                |         |  |            |              |         |                 |         |         |                |         |         |                |         |  |            |              |         |         |         |         |          |                 |         |                |                 |
| BMI >25           | ρ= 0.39 p<0.05                                               | ρ= 0.24                                                                    |                                                                           |                                                                                                                                                     |                                                                                                                                                                                                                             |                                                                                                                                                                                                                                                                                                                                                                                                                                                                                                                                                                                                                                                                                                                                                                                                                                                                                                                                                                                                                                                                                                                        |  |            |              |         |                 |                 |         |         |                |         |                |         |  |            |              |         |                 |         |         |                |         |         |                |         |  |            |              |         |         |         |         |          |                 |         |                |                 |
|                   | <u>men</u>                                                   | <u>women</u>                                                               |                                                                           |                                                                                                                                                     |                                                                                                                                                                                                                             |                                                                                                                                                                                                                                                                                                                                                                                                                                                                                                                                                                                                                                                                                                                                                                                                                                                                                                                                                                                                                                                                                                                        |  |            |              |         |                 |                 |         |         |                |         |                |         |  |            |              |         |                 |         |         |                |         |         |                |         |  |            |              |         |         |         |         |          |                 |         |                |                 |
| overall           | ρ= 0.19                                                      | ρ= 0.10                                                                    |                                                                           |                                                                                                                                                     |                                                                                                                                                                                                                             |                                                                                                                                                                                                                                                                                                                                                                                                                                                                                                                                                                                                                                                                                                                                                                                                                                                                                                                                                                                                                                                                                                                        |  |            |              |         |                 |                 |         |         |                |         |                |         |  |            |              |         |                 |         |         |                |         |         |                |         |  |            |              |         |         |         |         |          |                 |         |                |                 |
| BMI ≤25           | ρ= -0.06                                                     | ρ= 0.52 p≤0.001                                                            |                                                                           |                                                                                                                                                     |                                                                                                                                                                                                                             |                                                                                                                                                                                                                                                                                                                                                                                                                                                                                                                                                                                                                                                                                                                                                                                                                                                                                                                                                                                                                                                                                                                        |  |            |              |         |                 |                 |         |         |                |         |                |         |  |            |              |         |                 |         |         |                |         |         |                |         |  |            |              |         |         |         |         |          |                 |         |                |                 |
| BMI >25           | ρ= 0.40 p<0.05                                               | ρ= -0.36 p<0.05                                                            |                                                                           |                                                                                                                                                     |                                                                                                                                                                                                                             |                                                                                                                                                                                                                                                                                                                                                                                                                                                                                                                                                                                                                                                                                                                                                                                                                                                                                                                                                                                                                                                                                                                        |  |            |              |         |                 |                 |         |         |                |         |                |         |  |            |              |         |                 |         |         |                |         |         |                |         |  |            |              |         |         |         |         |          |                 |         |                |                 |
| Friedenreich 2006 | Am J Epidemiol. 2006 May 15; 163(10):959-70. Epub 2006 Mar 8 | n= 154, 35-65 years, residence in Calgary Health Region of Alberta, Canada | MTI ActiGraph (Manufacturing Technology Inc., Fort Walton Beach, FL, USA) | 7 days during waking hours, 4 one week periods within 1 year, 12 weeks apart to cover all seasons during waking hours, min 3 days, min 10 hours/day | PYTPYQ (past year total physical activity qu), occupational, household, recreational activity, at baseline, 9 weeks after baseline, after 12 months                                                                         | Spearman rank correlation<br><b>PYTPAQ - Acc (total PA)</b><br>ρ= 0.26 (total population) p <0.05<br>ρ= 0.39 (male) p <0.001<br>ρ= 0.14 (female)<br>ρ= 0.43 (age < 50) p <0.001<br>ρ= 0.05 (age ≥ 50)<br>ρ= 0.38 (BMI<25) p <0.05<br>ρ= 0.19 (BMI ≥ 25)<br>ρ= 0.26 (moderate PA) *significant<br>ρ= 0.34 (vigorous PA) *significant<br>ρ= -0.08 (light PA)                                                                                                                                                                                                                                                                                                                                                                                                                                                                                                                                                                                                                                                                                                                                                             |  |            |              |         |                 |                 |         |         |                |         |                |         |  |            |              |         |                 |         |         |                |         |         |                |         |  |            |              |         |         |         |         |          |                 |         |                |                 |

**Additional File 2. Summary of correlations of physical activity data assessed by questionnaires and accelerometers with respect to BMI (continued)**

| <i>Study</i>      | <i>Journal</i>                                                         | <i>No. of Participants</i>  | <i>Accelerometer used</i>                              | <i>Accelerometer wear method</i>                                                                                                                                                                                                                              | <i>Questionnaire used in investigation</i>                                                                                                                                                                                                                                                         | <i>Results</i>                                                                                                                                                                                                                                                                                                                                                                                                                                                                                                                                                                                                                                                                                                                                                                                                                                                                                                                                                                                                                                                                                                          |
|-------------------|------------------------------------------------------------------------|-----------------------------|--------------------------------------------------------|---------------------------------------------------------------------------------------------------------------------------------------------------------------------------------------------------------------------------------------------------------------|----------------------------------------------------------------------------------------------------------------------------------------------------------------------------------------------------------------------------------------------------------------------------------------------------|-------------------------------------------------------------------------------------------------------------------------------------------------------------------------------------------------------------------------------------------------------------------------------------------------------------------------------------------------------------------------------------------------------------------------------------------------------------------------------------------------------------------------------------------------------------------------------------------------------------------------------------------------------------------------------------------------------------------------------------------------------------------------------------------------------------------------------------------------------------------------------------------------------------------------------------------------------------------------------------------------------------------------------------------------------------------------------------------------------------------------|
| <b>Cust, 2008</b> | Intl Journal of Behavioral Nutrition and Physical Activity. 2008. 5:33 | 100 men, 82 women, 50-65    | ActiGraph (MTI) model 7164, LLC, Fort Walton Beach, FL | Right hip, attached to elastic belt. 3 separate 7-consecutive day periods during follow up each 14 weeks apart. Wear during waking hours except when in water. 1 minute epochs. Valid days min. 10 hrs. weeks with fewer than 4-days valid data were excluded | EPIC questionnaire - for PA in past-year in occupational, leisure, and home domains.<br><br>Friedenreich Lifetime Total Physical Activity Questionnaire (LTPAQ). Frequency, duration, and intensity of physical activity in 4 different domains (work, recreation, home, transport) over lifetime. | <b>EPIC &amp; Accelerometer:</b><br>PA: $\rho = 0.29$ (0.15 - 0.42)<br>Cambridge Index: $\rho = 0.32$ (0.19 - 0.45)<br>Occupational Level Index: $\rho = 0.37$ (0.22 - 0.51)<br><b>EPIC Qu measures - total PA (accelerometer)</b><br>Total non-occupational: $\rho = 0.21$ (0.07 - 0.35)<br>Males: $\rho = 0.24$ (0.05 - 0.42)<br>Females $\rho = 0.16$ (-0.06 - 0.36)<br><27.2 BMI (89): $\rho = 0.33$ (0.14 - 0.51)<br>≥27.2 BMI (92): $\rho = 0.12$ (-0.09 - 0.32)<br><58yrs (95): $\rho = 0.25$ (0.05 - 0.43)<br>≥58yrs (87): $\rho = 0.18$ (-0.03 - 0.37)<br>Full Time work (113): $\rho = 0.17$ (-0.02 - 0.34)<br>Other (68): $\rho = 0.30$ (0.07 - 0.50)<br>Vigorous Activity (self-rated): $\rho = 0.18$ (0.04 - 0.50)<br>Vigorous Activity (MET): $\rho = 0.23$ (0.09 - 0.37)<br>Light-Moderate Activity: $\rho = 0.19$ (0.05 - 0.33)                                                                                                                                                                                                                                                                         |
| <b>Lee, 2011</b>  | Int J Behav Nutr Phys Act. 2011 Aug 1; 8:81.                           | n= 1270 (42.9 ± 14.4 years) | ActiGraph GT1M                                         | 4 consecutive days, around waist, 2 weekdays+2 weekend days, during waking hours, first day always Thursday, Friday, Saturday), less than 600 min of registered time/day-> invalid, 1 min epoch,                                                              | IPAQ-C, short form (9items vs. 31items long form), equivalent psychometric properties to the long form                                                                                                                                                                                             | Spearman correlation<br><b>IPAQ-C (moderate PA) vs. Acc (min in moderate PA)</b><br>$\rho = 0.10$ , $P < 0.05$ <u>men</u> ; $\rho = 0.09$ , $P < 0.05$ <u>women</u><br>$\rho = 0.05$ <u>≤29 years</u> ; $\rho = 0.09$ <u>30-49 years</u> ; $\rho = P < 0.05$ <u>≥50 years</u><br>$\rho = 0.10$ <u>BMI ≥25</u> ; $\rho = 0.09$ , $P < 0.01$ <u>BMI &lt; 25</u><br><b>IPAQ-C (vigorous PA) vs. Acc (min in vigorous PA)</b><br>$\rho = 0.23$ , $P < 0.001$ <u>men</u> ; $\rho = 0.09$ , $P < 0.05$ <u>women</u><br>$\rho = 0.21$ , $P < 0.001$ <u>≤29 years</u> ; $\rho = 0.12$ , $P < 0.01$ <u>30-49 years</u> ; $\rho = P < 0.01$ <u>≥50 years</u><br>$\rho = 0.22$ , $P < 0.001$ <u>BMI ≥25</u> ; $\rho = 0.14$ , $P < 0.001$ <u>BMI &lt; 25</u><br><b>IPAQ-C (total MET) vs. Acc (counts/h)</b><br>$\rho = 0.18$ , $P < 0.001$ <u>men</u> ; $\rho = 0.15$ , $P < 0.001$ <u>women</u><br>$\rho = 0.04$ <u>≤29 years</u> ; $\rho = 0.19$ , $P < 0.001$ <u>30-49 years</u> ; $\rho = 0.25$ , $P < 0.001$ <u>≥50 years</u><br>$\rho = 0.21$ , $P < 0.001$ <u>BMI ≥25</u> ; $\rho = 0.14$ , $P < 0.001$ <u>BMI &lt; 25</u> |

**Additional File 2. Summary of correlations of physical activity data assessed by questionnaires and accelerometers with respect to BMI (continued)**

| <i>Study</i>      | <i>Journal</i>                                             | <i>No. of Participants</i>            | <i>Accelerometer used</i>                           | <i>Accelerometer wear method</i>                               | <i>Questionnaire used in investigation</i>                                                                 | <i>Results</i>                                                                                                                                                                                                                                                                                                                                                                                                                                                                                                                                                                                                                                                                                                                                                                                                                                                                                                                                                                                                                                                                                                                                                                                                                                                                                                                                                                                                                                                                                                                                            |
|-------------------|------------------------------------------------------------|---------------------------------------|-----------------------------------------------------|----------------------------------------------------------------|------------------------------------------------------------------------------------------------------------|-----------------------------------------------------------------------------------------------------------------------------------------------------------------------------------------------------------------------------------------------------------------------------------------------------------------------------------------------------------------------------------------------------------------------------------------------------------------------------------------------------------------------------------------------------------------------------------------------------------------------------------------------------------------------------------------------------------------------------------------------------------------------------------------------------------------------------------------------------------------------------------------------------------------------------------------------------------------------------------------------------------------------------------------------------------------------------------------------------------------------------------------------------------------------------------------------------------------------------------------------------------------------------------------------------------------------------------------------------------------------------------------------------------------------------------------------------------------------------------------------------------------------------------------------------------|
| <b>Kwak, 2012</b> | J Phys Act Health. 2012 Nov;9(8):1130-7. Epub 2011 Dec 27. | N=440, mean age=49.4 years, 44% males | ActiGraph GT1M (ActiGraph, Pensacola, Florida, USA) | 7 days, during waking hours, attached to the center of gravity | International Physical Activity Questionnaire (IPAQ) long form, at least 4 days with at least 10 hours/day | <p>Spearman correlation<br/>IPAQ-L work vs. accelerometer (min/day)</p> <p><b>Total</b><br/>Accelerometer-MVPA-work: <math>\rho=0.46</math>, <math>P&lt;0.01</math><br/>Accelerometer-work: <math>\rho=0.39</math>, <math>P&lt;0.01</math><br/>Accelerometer-total: <math>\rho=0.26</math>, <math>P&lt;0.01</math></p> <p><b>Men</b><br/>Accelerometer-MVPA-work: <math>\rho=0.44</math>, <math>P&lt;0.01</math><br/>Accelerometer-work: <math>\rho=0.33</math>, <math>P&lt;0.01</math><br/>Accelerometer-total: <math>\rho=0.21</math>, <math>P&lt;0.01</math></p> <p><b>Women</b><br/>Accelerometer-MVPA-work: <math>\rho=0.49</math>, <math>P&lt;0.01</math><br/>Accelerometer-work: <math>\rho=0.41</math>, <math>P&lt;0.01</math><br/>Accelerometer-total: <math>\rho=0.36</math>, <math>P&lt;0.01</math></p> <p><b>BMI</b></p> <p>(&lt;25kg/m<sup>2</sup>) Accelerometer-MVPA-work: <math>\rho=0.44</math>, <math>P&lt;0.01</math><br/>Accelerometer-work: <math>\rho=0.41</math>, <math>P&lt;0.01</math><br/>Accelerometer-total: <math>\rho=0.36</math>, <math>P&lt;0.01</math></p> <p>(25-30 kg/m<sup>2</sup>) Accelerometer-work: <math>\rho=0.55</math>, <math>P&lt;0.01</math><br/>Accelerometer-work: <math>\rho=0.43</math>, <math>P&lt;0.01</math><br/>Accelerometer-total: <math>\rho=0.28</math>, <math>P&lt;0.01</math></p> <p>(≥30kg/m<sup>2</sup>) Accelerometer-total: <math>\rho=0.27</math>, <math>P&lt;0.01</math><br/>Accelerometer-work: <math>\rho=0.26</math>, n.s.<br/>Accelerometer-total: <math>\rho=0.01</math>, n.s.</p> |

***Additional File 2. Summary of correlations of physical activity data assessed by questionnaires and accelerometers with respect to BMI (continued)***

| <i>Study</i>        | <i>Journal</i>                               | <i>No. of Participants</i> | <i>Accelerometer used</i>                  | <i>Accelerometer wear method</i>                                                                                                                   | <i>Questionnaire used in investigation</i> | <i>Results</i>                                                                                                                                                                                                                                                                                                                                                                                           |
|---------------------|----------------------------------------------|----------------------------|--------------------------------------------|----------------------------------------------------------------------------------------------------------------------------------------------------|--------------------------------------------|----------------------------------------------------------------------------------------------------------------------------------------------------------------------------------------------------------------------------------------------------------------------------------------------------------------------------------------------------------------------------------------------------------|
| <b>Warner, 2013</b> | Am J Health Behav. Mar 2012; 36(2): 168–178. | N=135                      | Actical; Phillips/Respirics, Bend, OR USA) | 6 consecutive days, on hip, with clip, or waistband, during waking hours, $\geq 4$ days, $\geq 10$ h/d, within 10h max. 2h period of non-wear time | IPAQ short form                            | Age and gender adjusted Spearman correlation coefficients<br>IPAQ-S vs. accelerometer<br>1min-bout length :<br>Underweight/normal: $\rho = 0.28$ , $P = 0.14$<br>Overweight: $\rho = 0.43$ , $P = 0.022$<br>Obese: $\rho = 0.21$ , $P = 0.067$<br>10min-bout length:<br>Underweight/normal: $\rho = 0.36$ , $P = 0.055$<br>Overweight: $\rho = 0.55$ , $P = 0.0026$<br>Obese: $\rho = 0.14$ , $P = 0.24$ |

**Abbreviations:** IPAQ, International Physical Activity Questionnaire; Acc, accelerometry; BWHS, Black Women's Health Study; Qu, Questionnaire; PYTPYQ, past year total physical activity questionnaire; PA, physical activity; PAQ-EJ, physical activity questionnaire for elderly Japanese; MET, metabolic equivalent of task; PASE, physical activity scale for the elderly; EPIC, European Prospective Investigation into Cancer and Nutrition; EE, energy expenditure; GPAQ, Global Physical Activity Questionnaire; MVPA, moderate-vigorous physical activity; SP2PAQ, Singapore Prospective Study Program Physical Activity Questionnaire;
