# Supplementary material for: Accelerometry and physical activity questionnaires - a systematic review
Source: Springer Nature journal article supplement (doi:10.1186/s12889-016-3172-0), 2016-06-16
Supplement: MOESM1 [file 10267662]

**Additional File 1. Summary of correlations of physical activity data assessed by questionnaires and accelerometers with respect to Gender**

| <i>Study</i>              | <i>Journal</i>                          | <i>No. of Participants</i>                                                                            | <i>Accelerometer used</i>                                         | <i>Accelerometer wear method</i>                                                                      | <i>Questionnaire used in investigation</i>                                                                                                                                                                                  | <i>Results</i>                                                                                                                                                                                                                                                                                                                                                                                                                                                                                                                                                                                                                                                                                                                                                                                                                                                                                                                                                                                                                                                                                                                                                                                                                                                                                                                                                                                                                                                                                                                        |  |            |              |         |                       |                       |         |               |                       |         |                       |               |  |            |              |         |                       |               |         |                       |               |         |                       |               |  |            |              |         |               |               |         |                |                        |         |                       |                        |
|---------------------------|-----------------------------------------|-------------------------------------------------------------------------------------------------------|-------------------------------------------------------------------|-------------------------------------------------------------------------------------------------------|-----------------------------------------------------------------------------------------------------------------------------------------------------------------------------------------------------------------------------|---------------------------------------------------------------------------------------------------------------------------------------------------------------------------------------------------------------------------------------------------------------------------------------------------------------------------------------------------------------------------------------------------------------------------------------------------------------------------------------------------------------------------------------------------------------------------------------------------------------------------------------------------------------------------------------------------------------------------------------------------------------------------------------------------------------------------------------------------------------------------------------------------------------------------------------------------------------------------------------------------------------------------------------------------------------------------------------------------------------------------------------------------------------------------------------------------------------------------------------------------------------------------------------------------------------------------------------------------------------------------------------------------------------------------------------------------------------------------------------------------------------------------------------|--|------------|--------------|---------|-----------------------|-----------------------|---------|---------------|-----------------------|---------|-----------------------|---------------|--|------------|--------------|---------|-----------------------|---------------|---------|-----------------------|---------------|---------|-----------------------|---------------|--|------------|--------------|---------|---------------|---------------|---------|----------------|------------------------|---------|-----------------------|------------------------|
| <b>Timperio, 2003</b>     | J Sci Med Sport. 2003 Dec; 6(4):477-91. | n= 144<br>n= 122 (for validation data)<br>18+ years                                                   | MTI/CSA accelerometer (model 7164)                                | 7 consecutive days, during waking hours, attached with adjustable belt, on right hip, 1 minute epochs | One week recall PAQ, assesses frequency and duration of walking, other moderate intensity activity and vigorous intensity activity, questionnaire administered twice -> 3 days apart, again after accelerometer measurement | <p>Spearman correlation</p> <p><b>Correlation PAQ (min/day) vs. Accelerometer (min/day)</b></p> <p><u>PAQ (duration of ≥3.0 METs) vs. Acc:</u></p> <table> <tr> <td></td> <td><u>men</u></td> <td><u>women</u></td> </tr> <tr> <td>overall</td> <td><math>\rho = 0.29</math> p &lt;0.05</td> <td><math>\rho = 0.25</math> p &lt;0.05</td> </tr> <tr> <td>BMI ≤25</td> <td><math>\rho = 0.26</math></td> <td><math>\rho = 0.39</math> p &lt;0.01</td> </tr> <tr> <td>BMI &gt;25</td> <td><math>\rho = 0.36</math> p &lt;0.05</td> <td><math>\rho = 0.09</math></td> </tr> </table> <p><u>PAQ (duration of 3.0-5.9 METs) vs. Acc:</u></p> <table> <tr> <td></td> <td><u>men</u></td> <td><u>women</u></td> </tr> <tr> <td>overall</td> <td><math>\rho = 0.40</math> p &lt;0.01</td> <td><math>\rho = 0.19</math></td> </tr> <tr> <td>BMI ≤25</td> <td><math>\rho = 0.37</math> p &lt;0.05</td> <td><math>\rho = 0.19</math></td> </tr> <tr> <td>BMI &gt;25</td> <td><math>\rho = 0.39</math> p &lt;0.05</td> <td><math>\rho = 0.24</math></td> </tr> </table> <p><u>PAQ (duration of 6.0+ METs) vs. Acc:</u></p> <table> <tr> <td></td> <td><u>men</u></td> <td><u>women</u></td> </tr> <tr> <td>overall</td> <td><math>\rho = 0.19</math></td> <td><math>\rho = 0.10</math></td> </tr> <tr> <td>BMI ≤25</td> <td><math>\rho = -0.06</math></td> <td><math>\rho = 0.52</math> p &lt;0.001</td> </tr> <tr> <td>BMI &gt;25</td> <td><math>\rho = 0.40</math> p &lt;0.05</td> <td><math>\rho = -0.36</math> p &lt;0.05</td> </tr> </table> |  | <u>men</u> | <u>women</u> | overall | $\rho = 0.29$ p <0.05 | $\rho = 0.25$ p <0.05 | BMI ≤25 | $\rho = 0.26$ | $\rho = 0.39$ p <0.01 | BMI >25 | $\rho = 0.36$ p <0.05 | $\rho = 0.09$ |  | <u>men</u> | <u>women</u> | overall | $\rho = 0.40$ p <0.01 | $\rho = 0.19$ | BMI ≤25 | $\rho = 0.37$ p <0.05 | $\rho = 0.19$ | BMI >25 | $\rho = 0.39$ p <0.05 | $\rho = 0.24$ |  | <u>men</u> | <u>women</u> | overall | $\rho = 0.19$ | $\rho = 0.10$ | BMI ≤25 | $\rho = -0.06$ | $\rho = 0.52$ p <0.001 | BMI >25 | $\rho = 0.40$ p <0.05 | $\rho = -0.36$ p <0.05 |
|                           | <u>men</u>                              | <u>women</u>                                                                                          |                                                                   |                                                                                                       |                                                                                                                                                                                                                             |                                                                                                                                                                                                                                                                                                                                                                                                                                                                                                                                                                                                                                                                                                                                                                                                                                                                                                                                                                                                                                                                                                                                                                                                                                                                                                                                                                                                                                                                                                                                       |  |            |              |         |                       |                       |         |               |                       |         |                       |               |  |            |              |         |                       |               |         |                       |               |         |                       |               |  |            |              |         |               |               |         |                |                        |         |                       |                        |
| overall                   | $\rho = 0.29$ p <0.05                   | $\rho = 0.25$ p <0.05                                                                                 |                                                                   |                                                                                                       |                                                                                                                                                                                                                             |                                                                                                                                                                                                                                                                                                                                                                                                                                                                                                                                                                                                                                                                                                                                                                                                                                                                                                                                                                                                                                                                                                                                                                                                                                                                                                                                                                                                                                                                                                                                       |  |            |              |         |                       |                       |         |               |                       |         |                       |               |  |            |              |         |                       |               |         |                       |               |         |                       |               |  |            |              |         |               |               |         |                |                        |         |                       |                        |
| BMI ≤25                   | $\rho = 0.26$                           | $\rho = 0.39$ p <0.01                                                                                 |                                                                   |                                                                                                       |                                                                                                                                                                                                                             |                                                                                                                                                                                                                                                                                                                                                                                                                                                                                                                                                                                                                                                                                                                                                                                                                                                                                                                                                                                                                                                                                                                                                                                                                                                                                                                                                                                                                                                                                                                                       |  |            |              |         |                       |                       |         |               |                       |         |                       |               |  |            |              |         |                       |               |         |                       |               |         |                       |               |  |            |              |         |               |               |         |                |                        |         |                       |                        |
| BMI >25                   | $\rho = 0.36$ p <0.05                   | $\rho = 0.09$                                                                                         |                                                                   |                                                                                                       |                                                                                                                                                                                                                             |                                                                                                                                                                                                                                                                                                                                                                                                                                                                                                                                                                                                                                                                                                                                                                                                                                                                                                                                                                                                                                                                                                                                                                                                                                                                                                                                                                                                                                                                                                                                       |  |            |              |         |                       |                       |         |               |                       |         |                       |               |  |            |              |         |                       |               |         |                       |               |         |                       |               |  |            |              |         |               |               |         |                |                        |         |                       |                        |
|                           | <u>men</u>                              | <u>women</u>                                                                                          |                                                                   |                                                                                                       |                                                                                                                                                                                                                             |                                                                                                                                                                                                                                                                                                                                                                                                                                                                                                                                                                                                                                                                                                                                                                                                                                                                                                                                                                                                                                                                                                                                                                                                                                                                                                                                                                                                                                                                                                                                       |  |            |              |         |                       |                       |         |               |                       |         |                       |               |  |            |              |         |                       |               |         |                       |               |         |                       |               |  |            |              |         |               |               |         |                |                        |         |                       |                        |
| overall                   | $\rho = 0.40$ p <0.01                   | $\rho = 0.19$                                                                                         |                                                                   |                                                                                                       |                                                                                                                                                                                                                             |                                                                                                                                                                                                                                                                                                                                                                                                                                                                                                                                                                                                                                                                                                                                                                                                                                                                                                                                                                                                                                                                                                                                                                                                                                                                                                                                                                                                                                                                                                                                       |  |            |              |         |                       |                       |         |               |                       |         |                       |               |  |            |              |         |                       |               |         |                       |               |         |                       |               |  |            |              |         |               |               |         |                |                        |         |                       |                        |
| BMI ≤25                   | $\rho = 0.37$ p <0.05                   | $\rho = 0.19$                                                                                         |                                                                   |                                                                                                       |                                                                                                                                                                                                                             |                                                                                                                                                                                                                                                                                                                                                                                                                                                                                                                                                                                                                                                                                                                                                                                                                                                                                                                                                                                                                                                                                                                                                                                                                                                                                                                                                                                                                                                                                                                                       |  |            |              |         |                       |                       |         |               |                       |         |                       |               |  |            |              |         |                       |               |         |                       |               |         |                       |               |  |            |              |         |               |               |         |                |                        |         |                       |                        |
| BMI >25                   | $\rho = 0.39$ p <0.05                   | $\rho = 0.24$                                                                                         |                                                                   |                                                                                                       |                                                                                                                                                                                                                             |                                                                                                                                                                                                                                                                                                                                                                                                                                                                                                                                                                                                                                                                                                                                                                                                                                                                                                                                                                                                                                                                                                                                                                                                                                                                                                                                                                                                                                                                                                                                       |  |            |              |         |                       |                       |         |               |                       |         |                       |               |  |            |              |         |                       |               |         |                       |               |         |                       |               |  |            |              |         |               |               |         |                |                        |         |                       |                        |
|                           | <u>men</u>                              | <u>women</u>                                                                                          |                                                                   |                                                                                                       |                                                                                                                                                                                                                             |                                                                                                                                                                                                                                                                                                                                                                                                                                                                                                                                                                                                                                                                                                                                                                                                                                                                                                                                                                                                                                                                                                                                                                                                                                                                                                                                                                                                                                                                                                                                       |  |            |              |         |                       |                       |         |               |                       |         |                       |               |  |            |              |         |                       |               |         |                       |               |         |                       |               |  |            |              |         |               |               |         |                |                        |         |                       |                        |
| overall                   | $\rho = 0.19$                           | $\rho = 0.10$                                                                                         |                                                                   |                                                                                                       |                                                                                                                                                                                                                             |                                                                                                                                                                                                                                                                                                                                                                                                                                                                                                                                                                                                                                                                                                                                                                                                                                                                                                                                                                                                                                                                                                                                                                                                                                                                                                                                                                                                                                                                                                                                       |  |            |              |         |                       |                       |         |               |                       |         |                       |               |  |            |              |         |                       |               |         |                       |               |         |                       |               |  |            |              |         |               |               |         |                |                        |         |                       |                        |
| BMI ≤25                   | $\rho = -0.06$                          | $\rho = 0.52$ p <0.001                                                                                |                                                                   |                                                                                                       |                                                                                                                                                                                                                             |                                                                                                                                                                                                                                                                                                                                                                                                                                                                                                                                                                                                                                                                                                                                                                                                                                                                                                                                                                                                                                                                                                                                                                                                                                                                                                                                                                                                                                                                                                                                       |  |            |              |         |                       |                       |         |               |                       |         |                       |               |  |            |              |         |                       |               |         |                       |               |         |                       |               |  |            |              |         |               |               |         |                |                        |         |                       |                        |
| BMI >25                   | $\rho = 0.40$ p <0.05                   | $\rho = -0.36$ p <0.05                                                                                |                                                                   |                                                                                                       |                                                                                                                                                                                                                             |                                                                                                                                                                                                                                                                                                                                                                                                                                                                                                                                                                                                                                                                                                                                                                                                                                                                                                                                                                                                                                                                                                                                                                                                                                                                                                                                                                                                                                                                                                                                       |  |            |              |         |                       |                       |         |               |                       |         |                       |               |  |            |              |         |                       |               |         |                       |               |         |                       |               |  |            |              |         |               |               |         |                |                        |         |                       |                        |
| <b>Carter-Nolan, 2006</b> | Ethn Dis. 2006 Autumn; 16(4):943-7.     | n = 101<br>African American women, residence in Washington DC, metropol. Area, 21-69 years ambulatory | Computer Science and Applications Model 7164 (version AM7164-2.2) | 7 consecutive days, during waking hours, 1 min-epochs                                                 | Questions from BWHS (Black Women's Health Study), hours/week of participation in walking for exercise, hours/week of moderate activity, hours/week of strenuous activity                                                    | <p>Spearman Correlation</p> <p><b>Acc counts - BWHS Qu</b></p> <p><math>\rho = 0.28^{\dagger}</math> (BWHS total activities)</p> <p><math>\rho = 0.26^{\dagger}</math> (BWHS walking)</p> <p><math>\rho = -0.04</math> (BWHS moderate activity)</p> <p><math>\rho = 0.4^{\dagger}</math> (BWHS vigorous activity)</p> <p><sup>†</sup> is significant at the 0.01 level</p>                                                                                                                                                                                                                                                                                                                                                                                                                                                                                                                                                                                                                                                                                                                                                                                                                                                                                                                                                                                                                                                                                                                                                            |  |            |              |         |                       |                       |         |               |                       |         |                       |               |  |            |              |         |                       |               |         |                       |               |         |                       |               |  |            |              |         |               |               |         |                |                        |         |                       |                        |

**Additional File 1. Summary of correlations of physical activity data assessed by questionnaires and accelerometers with respect to Gender (continued)**

| <i>Study</i>                 | <i>Journal</i>                                               | <i>No. of Participants</i>                                                       | <i>Accelerometer used</i>                                                             | <i>Accelerometer wear method</i>                                                                                                                    | <i>Questionnaire used in investigation</i>                                                                                                                                                                                                                                                                                                    | <i>Results</i>                                                                                                                                                                                                                                                                                                                                                                                                                                                                                                                                                                                                                                                                                                                                                                                                                                                                                                                                                                                                                                                                                                                              |      |     |     |  |       |  |   |   |   |   |          |                  |      |      |      |  |          |          |      |       |       |  |          |                   |      |       |      |  |         |          |      |        |      |       |         |                   |      |         |      |        |         |          |       |       |       |  |         |                 |       |      |       |       |                 |              |       |       |       |       |
|------------------------------|--------------------------------------------------------------|----------------------------------------------------------------------------------|---------------------------------------------------------------------------------------|-----------------------------------------------------------------------------------------------------------------------------------------------------|-----------------------------------------------------------------------------------------------------------------------------------------------------------------------------------------------------------------------------------------------------------------------------------------------------------------------------------------------|---------------------------------------------------------------------------------------------------------------------------------------------------------------------------------------------------------------------------------------------------------------------------------------------------------------------------------------------------------------------------------------------------------------------------------------------------------------------------------------------------------------------------------------------------------------------------------------------------------------------------------------------------------------------------------------------------------------------------------------------------------------------------------------------------------------------------------------------------------------------------------------------------------------------------------------------------------------------------------------------------------------------------------------------------------------------------------------------------------------------------------------------|------|-----|-----|--|-------|--|---|---|---|---|----------|------------------|------|------|------|--|----------|----------|------|-------|-------|--|----------|-------------------|------|-------|------|--|---------|----------|------|--------|------|-------|---------|-------------------|------|---------|------|--------|---------|----------|-------|-------|-------|--|---------|-----------------|-------|------|-------|-------|-----------------|--------------|-------|-------|-------|-------|
| <b>Friedenreich, 2006</b>    | Am J Epidemiol. 2006 May 15; 163(10):959-70. Epub 2006 Mar 8 | n= 154, 35-65 years, residence in Calgary Health Region of Alberta, Canada       | MTI ActiGraph (Manufacturing Technology Inc., Fort Walton Beach, FL, USA)             | 7 days during waking hours, 4 one week periods within 1 year, 12 weeks apart to cover all seasons during waking hours, min 3 days, min 10 hours/day | PYTPYQ (past year total physical activity qu), occupational, household, recreational activity, at baseline, 9 weeks after baseline, after 12 months                                                                                                                                                                                           | Spearman rank correlation<br><b>PYTPAQ - Acc (total PA)</b><br>ρ= 0.26 (total population) p <0.05<br>ρ= 0.39 (male) p <0.001<br>ρ= 0.14 (female)<br>ρ= 0.43 (age < 50) p <0.001<br>ρ= 0.05 (age ≥ 50)<br>ρ= 0.38 (BMI<25) p <0.05<br>ρ= 0.19 (BMI ≥ 25)<br>ρ= 0.26 (moderate PA) *significant<br>ρ= 0.34 (vigorous PA) *significant<br>ρ= -0.08 (light PA)                                                                                                                                                                                                                                                                                                                                                                                                                                                                                                                                                                                                                                                                                                                                                                                  |      |     |     |  |       |  |   |   |   |   |          |                  |      |      |      |  |          |          |      |       |       |  |          |                   |      |       |      |  |         |          |      |        |      |       |         |                   |      |         |      |        |         |          |       |       |       |  |         |                 |       |      |       |       |                 |              |       |       |       |       |
| <b>Kolbe-Alexander, 2006</b> | J Aging Phys Act. 2006 Jan;14(1):98-114                      | n= 122, >60 years, 52 men, 70 women, from mixed-racial-ancestry population group | MTI (formerly Computer Science and Applications [CSA], Inc.) Model 7162, Shalimar, FL | 7 consecutive days, 60s time epochs, during waking hours, on belt around waist, on right hip, min 10h/d                                             | <u>IPAQ (short version)</u> , intensity and duration of activities, transport, leisure and household activities, during usual week<br><u>YPAS (Yale Physical Activity Survey)</u> , part 1, frequency and duration in activities related to housework, yard work/gardening, caregiving, recreation and exercise, during week before interview | Spearman's rank order correlations<br><b>IPAQ (MET-min) - accelerometer</b>                                                                                                                                                                                                                                                                                                                                                                                                                                                                                                                                                                                                                                                                                                                                                                                                                                                                                                                                                                                                                                                                 |      |     |     |  |       |  |   |   |   |   |          |                  |      |      |      |  |          |          |      |       |       |  |          |                   |      |       |      |  |         |          |      |        |      |       |         |                   |      |         |      |        |         |          |       |       |       |  |         |                 |       |      |       |       |                 |              |       |       |       |       |
|                              |                                                              |                                                                                  |                                                                                       |                                                                                                                                                     |                                                                                                                                                                                                                                                                                                                                               | <table border="1"> <thead> <tr> <th rowspan="2">IPAQ</th> <th rowspan="2">Acc</th> <th colspan="2">men</th> <th colspan="2">women</th> </tr> <tr> <th>ρ</th> <th>P</th> <th>ρ</th> <th>P</th> </tr> </thead> <tbody> <tr> <td>vigorous</td> <td>high counts time</td> <td>0.43</td> <td>0.05</td> <td>0.05</td> <td></td> </tr> <tr> <td>moderate</td> <td>moderate</td> <td>0.31</td> <td>0.004</td> <td>-0.09</td> <td></td> </tr> <tr> <td>moderate</td> <td>total counts time</td> <td>0.37</td> <td>0.017</td> <td>0.08</td> <td></td> </tr> <tr> <td>walking</td> <td>moderate</td> <td>0.56</td> <td>0.0001</td> <td>0.32</td> <td>0.011</td> </tr> <tr> <td>walking</td> <td>total counts time</td> <td>0.57</td> <td>0.00007</td> <td>0.42</td> <td>0.0006</td> </tr> <tr> <td>sitting</td> <td>moderate</td> <td>-0.45</td> <td>0.003</td> <td>-0.22</td> <td></td> </tr> <tr> <td>sitting</td> <td>continuous time</td> <td>-0.39</td> <td>0.01</td> <td>-0.32</td> <td>0.011</td> </tr> <tr> <td>Weekend sitting</td> <td>total counts</td> <td>-0.40</td> <td>0.001</td> <td>-0.35</td> <td>0.005</td> </tr> </tbody> </table> | IPAQ | Acc | men |  | women |  | ρ | P | ρ | P | vigorous | high counts time | 0.43 | 0.05 | 0.05 |  | moderate | moderate | 0.31 | 0.004 | -0.09 |  | moderate | total counts time | 0.37 | 0.017 | 0.08 |  | walking | moderate | 0.56 | 0.0001 | 0.32 | 0.011 | walking | total counts time | 0.57 | 0.00007 | 0.42 | 0.0006 | sitting | moderate | -0.45 | 0.003 | -0.22 |  | sitting | continuous time | -0.39 | 0.01 | -0.32 | 0.011 | Weekend sitting | total counts | -0.40 | 0.001 | -0.35 | 0.005 |
| IPAQ                         | Acc                                                          | men                                                                              |                                                                                       | women                                                                                                                                               |                                                                                                                                                                                                                                                                                                                                               |                                                                                                                                                                                                                                                                                                                                                                                                                                                                                                                                                                                                                                                                                                                                                                                                                                                                                                                                                                                                                                                                                                                                             |      |     |     |  |       |  |   |   |   |   |          |                  |      |      |      |  |          |          |      |       |       |  |          |                   |      |       |      |  |         |          |      |        |      |       |         |                   |      |         |      |        |         |          |       |       |       |  |         |                 |       |      |       |       |                 |              |       |       |       |       |
|                              |                                                              | ρ                                                                                | P                                                                                     | ρ                                                                                                                                                   | P                                                                                                                                                                                                                                                                                                                                             |                                                                                                                                                                                                                                                                                                                                                                                                                                                                                                                                                                                                                                                                                                                                                                                                                                                                                                                                                                                                                                                                                                                                             |      |     |     |  |       |  |   |   |   |   |          |                  |      |      |      |  |          |          |      |       |       |  |          |                   |      |       |      |  |         |          |      |        |      |       |         |                   |      |         |      |        |         |          |       |       |       |  |         |                 |       |      |       |       |                 |              |       |       |       |       |
| vigorous                     | high counts time                                             | 0.43                                                                             | 0.05                                                                                  | 0.05                                                                                                                                                |                                                                                                                                                                                                                                                                                                                                               |                                                                                                                                                                                                                                                                                                                                                                                                                                                                                                                                                                                                                                                                                                                                                                                                                                                                                                                                                                                                                                                                                                                                             |      |     |     |  |       |  |   |   |   |   |          |                  |      |      |      |  |          |          |      |       |       |  |          |                   |      |       |      |  |         |          |      |        |      |       |         |                   |      |         |      |        |         |          |       |       |       |  |         |                 |       |      |       |       |                 |              |       |       |       |       |
| moderate                     | moderate                                                     | 0.31                                                                             | 0.004                                                                                 | -0.09                                                                                                                                               |                                                                                                                                                                                                                                                                                                                                               |                                                                                                                                                                                                                                                                                                                                                                                                                                                                                                                                                                                                                                                                                                                                                                                                                                                                                                                                                                                                                                                                                                                                             |      |     |     |  |       |  |   |   |   |   |          |                  |      |      |      |  |          |          |      |       |       |  |          |                   |      |       |      |  |         |          |      |        |      |       |         |                   |      |         |      |        |         |          |       |       |       |  |         |                 |       |      |       |       |                 |              |       |       |       |       |
| moderate                     | total counts time                                            | 0.37                                                                             | 0.017                                                                                 | 0.08                                                                                                                                                |                                                                                                                                                                                                                                                                                                                                               |                                                                                                                                                                                                                                                                                                                                                                                                                                                                                                                                                                                                                                                                                                                                                                                                                                                                                                                                                                                                                                                                                                                                             |      |     |     |  |       |  |   |   |   |   |          |                  |      |      |      |  |          |          |      |       |       |  |          |                   |      |       |      |  |         |          |      |        |      |       |         |                   |      |         |      |        |         |          |       |       |       |  |         |                 |       |      |       |       |                 |              |       |       |       |       |
| walking                      | moderate                                                     | 0.56                                                                             | 0.0001                                                                                | 0.32                                                                                                                                                | 0.011                                                                                                                                                                                                                                                                                                                                         |                                                                                                                                                                                                                                                                                                                                                                                                                                                                                                                                                                                                                                                                                                                                                                                                                                                                                                                                                                                                                                                                                                                                             |      |     |     |  |       |  |   |   |   |   |          |                  |      |      |      |  |          |          |      |       |       |  |          |                   |      |       |      |  |         |          |      |        |      |       |         |                   |      |         |      |        |         |          |       |       |       |  |         |                 |       |      |       |       |                 |              |       |       |       |       |
| walking                      | total counts time                                            | 0.57                                                                             | 0.00007                                                                               | 0.42                                                                                                                                                | 0.0006                                                                                                                                                                                                                                                                                                                                        |                                                                                                                                                                                                                                                                                                                                                                                                                                                                                                                                                                                                                                                                                                                                                                                                                                                                                                                                                                                                                                                                                                                                             |      |     |     |  |       |  |   |   |   |   |          |                  |      |      |      |  |          |          |      |       |       |  |          |                   |      |       |      |  |         |          |      |        |      |       |         |                   |      |         |      |        |         |          |       |       |       |  |         |                 |       |      |       |       |                 |              |       |       |       |       |
| sitting                      | moderate                                                     | -0.45                                                                            | 0.003                                                                                 | -0.22                                                                                                                                               |                                                                                                                                                                                                                                                                                                                                               |                                                                                                                                                                                                                                                                                                                                                                                                                                                                                                                                                                                                                                                                                                                                                                                                                                                                                                                                                                                                                                                                                                                                             |      |     |     |  |       |  |   |   |   |   |          |                  |      |      |      |  |          |          |      |       |       |  |          |                   |      |       |      |  |         |          |      |        |      |       |         |                   |      |         |      |        |         |          |       |       |       |  |         |                 |       |      |       |       |                 |              |       |       |       |       |
| sitting                      | continuous time                                              | -0.39                                                                            | 0.01                                                                                  | -0.32                                                                                                                                               | 0.011                                                                                                                                                                                                                                                                                                                                         |                                                                                                                                                                                                                                                                                                                                                                                                                                                                                                                                                                                                                                                                                                                                                                                                                                                                                                                                                                                                                                                                                                                                             |      |     |     |  |       |  |   |   |   |   |          |                  |      |      |      |  |          |          |      |       |       |  |          |                   |      |       |      |  |         |          |      |        |      |       |         |                   |      |         |      |        |         |          |       |       |       |  |         |                 |       |      |       |       |                 |              |       |       |       |       |
| Weekend sitting              | total counts                                                 | -0.40                                                                            | 0.001                                                                                 | -0.35                                                                                                                                               | 0.005                                                                                                                                                                                                                                                                                                                                         |                                                                                                                                                                                                                                                                                                                                                                                                                                                                                                                                                                                                                                                                                                                                                                                                                                                                                                                                                                                                                                                                                                                                             |      |     |     |  |       |  |   |   |   |   |          |                  |      |      |      |  |          |          |      |       |       |  |          |                   |      |       |      |  |         |          |      |        |      |       |         |                   |      |         |      |        |         |          |       |       |       |  |         |                 |       |      |       |       |                 |              |       |       |       |       |

**Additional File 1. Summary of correlations of physical activity data assessed by questionnaires and accelerometers with respect to Gender (continued)**

| <i>Study</i>                             | <i>Journal</i>                          | <i>No. of Participants</i>                                                       | <i>Accelerometer used</i>                                                             | <i>Accelerometer wear method</i>                                                                        | <i>Questionnaire used in investigation</i>                                                                                                                                                                                                                                                                                                    | <i>Results</i>                        |                 |        |        |        |        |
|------------------------------------------|-----------------------------------------|----------------------------------------------------------------------------------|---------------------------------------------------------------------------------------|---------------------------------------------------------------------------------------------------------|-----------------------------------------------------------------------------------------------------------------------------------------------------------------------------------------------------------------------------------------------------------------------------------------------------------------------------------------------|---------------------------------------|-----------------|--------|--------|--------|--------|
| <b>Kolbe-Alexander, 2006 (continued)</b> | J Aging Phys Act. 2006 Jan;14(1):98-114 | n= 122, >60 years, 52 men, 70 women, from mixed-racial-ancestry population group | MTI (formerly Computer Science and Applications [CSA], Inc.) Model 7162, Shalimar, FL | 7 consecutive days, 60s time epochs, during waking hours, on belt around waist, on right hip, min 10h/d | <u>IPAQ (short version)</u> , intensity and duration of activities, transport, leisure and household activities, during usual week<br><u>YPAS (Yale Physical Activity Survey)</u> , part 1, frequency and duration in activities related to housework, yard work/gardening, caregiving, recreation and exercise, during week before interview | <b>YPAS (MET-min) - accelerometer</b> |                 |        |        |        |        |
|                                          |                                         |                                                                                  |                                                                                       |                                                                                                         |                                                                                                                                                                                                                                                                                                                                               |                                       |                 | men    |        | women  |        |
|                                          |                                         |                                                                                  |                                                                                       |                                                                                                         |                                                                                                                                                                                                                                                                                                                                               | YPAS                                  | Acc             | $\rho$ | P      | $\rho$ | P      |
|                                          |                                         |                                                                                  |                                                                                       |                                                                                                         |                                                                                                                                                                                                                                                                                                                                               | work                                  | time moderate   | 0.31   | 0.0432 | -0.17  | n.s.   |
|                                          |                                         |                                                                                  |                                                                                       |                                                                                                         |                                                                                                                                                                                                                                                                                                                                               | work                                  | continuous time | 0.35   | 0.0237 | -0.19  | n.s.   |
|                                          |                                         |                                                                                  |                                                                                       |                                                                                                         |                                                                                                                                                                                                                                                                                                                                               | exercise                              | time moderate   | 0.40   | 0.0083 | 0.29   | 0.0213 |
|                                          |                                         |                                                                                  |                                                                                       |                                                                                                         |                                                                                                                                                                                                                                                                                                                                               | exercise                              | time high       | 0.39   | 0.009  | 0.27   | 0.0249 |
|                                          |                                         |                                                                                  |                                                                                       |                                                                                                         |                                                                                                                                                                                                                                                                                                                                               | exercise                              | continuous time | 0.34   | 0.0267 | 0.25   | 0.01   |
|                                          |                                         |                                                                                  |                                                                                       |                                                                                                         |                                                                                                                                                                                                                                                                                                                                               | exercise                              | total counts    | 0.54   | 0.0002 | 0.28   | 0.0261 |
|                                          |                                         |                                                                                  |                                                                                       |                                                                                                         |                                                                                                                                                                                                                                                                                                                                               | recreation                            | time moderate   | 0.25   | n.s.   | -0.26  | 0.0446 |
| YPAS                                     | TTL time moderate                       | 0.42                                                                             | 0.0059                                                                                | -0.005                                                                                                  | n.s.                                                                                                                                                                                                                                                                                                                                          |                                       |                 |        |        |        |        |
| YPAS                                     | TTL continuous time                     | 0.42                                                                             | 0.0058                                                                                | -0.29                                                                                                   | 0.0233                                                                                                                                                                                                                                                                                                                                        |                                       |                 |        |        |        |        |
| YPAS                                     | TTL total counts                        | 0.54                                                                             | 0.0002                                                                                | 0.13                                                                                                    | n.s.                                                                                                                                                                                                                                                                                                                                          |                                       |                 |        |        |        |        |

\*YPAS TTL: total weekly energy expenditure

**Additional File 1. Summary of correlations of physical activity data assessed by questionnaires and accelerometers with respect to Gender (continued)**

| <b>Study</b>                | <b>Journal</b>                                                        | <b>No. of Participants</b>                                                              | <b>Accelerometer used</b>                                                             | <b>Accelerometer wear method</b>                                                                                                                                                     | <b>Questionnaire used in investigation</b>                                                                                                                                                                                                                              | <b>Results</b>                                                                                                                                                                                                              |
|-----------------------------|-----------------------------------------------------------------------|-----------------------------------------------------------------------------------------|---------------------------------------------------------------------------------------|--------------------------------------------------------------------------------------------------------------------------------------------------------------------------------------|-------------------------------------------------------------------------------------------------------------------------------------------------------------------------------------------------------------------------------------------------------------------------|-----------------------------------------------------------------------------------------------------------------------------------------------------------------------------------------------------------------------------|
| <b>Johnson-Kozlow, 2006</b> | Intl Journal of Behavioral Nutrition and Physical Activity. 2006. 3:7 | 159 women (Breast Cancer from Women's Healthy Eating and Living Study); Avg, 57 yrs.    | MTI Actigraph accelerometer (7164 model) Fort Walton Beach, FL                        | In a pouch on a belt around the waist midway between the navel and the right side of the body. Wear during waking hours, excepting water activities. Recorded in 1-minute intervals. | 7-Day Physical Activity Recall (PAR):<br>Cues and prompts to help participants recall. Rated activity as moderate, hard, or very hard.<br><br>IPAQ:<br>Long form administered by phone. Moderate and vigorous activity in 4 domains (work, home, recreation, transport) | Validity Spearman correlation coefficient of total physical activity scores<br>$\rho = 0.73$ (PAR)<br>$\rho = 0.33$ (IPAQ)                                                                                                  |
| <b>Rosenberg, 2008</b>      | J Phys Act Health. 2008; 5 Suppl 1:S30-44.                            | n=200, 3 countries, convenience sample (staff, students, affiliated with universities)  | Computer Science and Application's Inc. (Shalimar, FL) accelerometer (CSA model 7164) | 7 days, during waking hours, min 600 minutes, min 5 valid days, min 1 weekend day, 1min epochs                                                                                       | Long and short IPAQ (sitting items), number of hours and minutes per day, weekday and weekend day, long form: time spent sitting in vehicle was assessed separately                                                                                                     | Spearman correlation<br><b>Acccounts (&lt;100/min) - total sitting</b><br><u>long form</u> <u>short form</u><br>$\rho = 0.33$ $r = 0.34$ (total)<br>$\rho = 0.26$ $r = 0.24$ (men)<br>$\rho = 0.40$ $r = 0.43$ (women)      |
| <b>Orsini, 2008</b>         | Eur J Epidemiol (2008). 23: 661-667                                   | 116 women, 56-75 years from Swedish Mammo-graphy Cohort                                 | MTI Actigraph model 7164                                                              | 7 consecutive days during waking hours Min. wear =10hr/day, min. days = 4                                                                                                            | Short self-administered questionnaire used to assess average physical activity/inactivity during previous year in the Cohort.                                                                                                                                           | Concordance Correlations for validity of total physical activity score:<br>Acc to questionnaire: 0.36 (0.21-0.52)<br>De-attenuated Acc to questionnaire: 0.38 (0.22 - 0.54)                                                 |
| <b>Wolin, 2008</b>          | Br J Sports Med. 2010 Aug; 44(10):741-6. Epub 2008 Nov 3.             | n= 142, 24-70 years, Black, African American, no restriction to usual physical activity | Actical activity monitor (Mini Mitter Co., Bend, OR)                                  | 6 consecutive days, on hip, clip, or waistband, during waking hours, $\geq 4$ days, $\geq 10$ h/d,                                                                                   | IPAQ short form, past 7 days                                                                                                                                                                                                                                            | Spearman correlation<br>~ 1-min bout length<br><b>IPAQ-SF - Acc Counts:</b><br>$\rho = 0.36$ P <0.001<br>$\rho = 0.58$ P <0.001 men<br>$\rho = 0.21$ P= 0.05 women<br>Agreement between both. $k = 0.21$ , 95%CI: -0.4-0.47 |

**Additional File 1. Summary of correlations of physical activity data assessed by questionnaires and accelerometers with respect to Gender (continued)**

| <i>Study</i>                 | <i>Journal</i>                                            | <i>No. of Participants</i>                                                              | <i>Accelerometer used</i>                                       | <i>Accelerometer wear method</i>                                                                                                                              | <i>Questionnaire used in investigation</i>                                                                                                                             | <i>Results</i>                                                                                                                                                                                                                                                                                                                                                                                                                                                                                                                                                                                                                                                                                                                                                                                                                                                                                                 |
|------------------------------|-----------------------------------------------------------|-----------------------------------------------------------------------------------------|-----------------------------------------------------------------|---------------------------------------------------------------------------------------------------------------------------------------------------------------|------------------------------------------------------------------------------------------------------------------------------------------------------------------------|----------------------------------------------------------------------------------------------------------------------------------------------------------------------------------------------------------------------------------------------------------------------------------------------------------------------------------------------------------------------------------------------------------------------------------------------------------------------------------------------------------------------------------------------------------------------------------------------------------------------------------------------------------------------------------------------------------------------------------------------------------------------------------------------------------------------------------------------------------------------------------------------------------------|
| <b>Wolin, 2008 continued</b> | Br J Sports Med. 2010 Aug; 44(10):741-6. Epub 2008 Nov 3. | n= 142, 24-70 years, Black, African American, no restriction to usual physical activity | Actical activity monitor (Mini Mitter Co., Bend, OR)            | 6 consecutive days, on hip, with clip, or waistband, during waking hours, $\geq 4$ days, $\geq 10$ h/d, within 10h one 2h period of non-wear time was allowed | IPAQ short form, past 7 days                                                                                                                                           | ~ 10-min bout length<br><b>IPAQ-SF - Acc Counts:</b><br>$\rho = 0.26$ $P = 0.002$<br>$\rho = 0.48$ $P = 0.003$ men<br>$\rho = 0.07$ $P = 0.48$ women<br>Agreement between both: $k = 0.04$ , 95% CI: 0.01-0.06.                                                                                                                                                                                                                                                                                                                                                                                                                                                                                                                                                                                                                                                                                                |
| <b>Hagiwara, 2008</b>        | Geriatr Gerontol Int. 2008 Sep; 8(3):143-51.              | n= 325, 65+ years, no cognitive disorder or deficiency in activities of daily living    | Life Corder; Suzuken, Tokyo, Japan                              | 3 days, after filling out PA questionnaire, during waking hours                                                                                               | PASE (physical activity scale for the elderly), leisure time, household, work-related, past 7 days                                                                     | Spearman rank correlation<br><b>PASE-Acc steps:</b><br>total: $\rho = 0.17$ ( $P = 0.01$ )<br>men: $\rho = 0.38$ $p < 0.001$<br>women: $\rho = -0.02$<br><b>PASE-Acc Energy expenditure:</b><br>total: $\rho = 0.16$ $P = 0.02$<br>men: $\rho = 0.35$ $p = 0.001$<br>women: $\rho = 0.01$                                                                                                                                                                                                                                                                                                                                                                                                                                                                                                                                                                                                                      |
| <b>Jacobi, 2009</b>          | Eur J Epidemiol. 2009; 24(4):171-9. Epub 2009 Mar 13.     | n= 141 (160), 18-74 years, low habitual PA levels                                       | ActiGraph (model 7164, Manufacturing Technology, Inc., FL, USA) | 7 consecutive days, 1 min epochs, worn on nylon pouch, on a belt, around waist, during all waking hours, min 4 days, min 8h/d                                 | Modifiable AQ (MAQ) French version, past year PA leisure time & work, as well as sedentary behavior, all non-occupational non-leisure PA was added to the original Qu. | Spearman correlations<br><b>women:</b><br><b>total PA (counts/d) - total leisure time PA:</b><br>$\rho = 0.25$ ( $P < 0.05$ ) (h/week), $\rho = 0.18$ (METh/week)<br><b>total PA (counts/d) - moderate intensity leisure time PA:</b><br>$\rho = 0.20$ ( $P < 0.1$ ) (h/week), $\rho = 0.22$ ( $P < 0.05$ ) (METh/week)<br><b>total PA (counts/d) - vigorous intensity leisure time PA:</b><br>$\rho = 0.08$ (h/week), $\rho = 0.08$ (METh/week)<br><b>total PA (counts/d) vs. total activity (METh/week)</b><br>$\rho = 0.07$<br><b>men:</b><br><b>total PA (counts/d) - total leisure time PA:</b><br>$\rho = 0.04$ (h/week), $\rho = -0.05$ (METh/week)<br><b>total PA (counts/d) - moderate intensity leisure time PA:</b><br>$\rho = 0.04$ (h/week), $\rho = 0.03$ (METh/week)<br><b>total PA (counts/d) - vigorous intensity leisure time PA:</b><br>$\rho = -0.15$ (h/week), $\rho = -0.15$ (METh/week) |

**Additional File 1. Summary of correlations of physical activity data assessed by questionnaires and accelerometers with respect to Gender (continued)**

| <i>Study</i>                  | <i>Journal</i>                                               | <i>No. of Participants</i>                                             | <i>Accelerometer used</i>                                                             | <i>Accelerometer wear method</i>                                                                                                                                               | <i>Questionnaire used in investigation</i>                                                                                                                                                                                                                           | <i>Results</i>                                                                                                                                                                                                                                                                                                                                                                                                                                                                                                                                                                                           |
|-------------------------------|--------------------------------------------------------------|------------------------------------------------------------------------|---------------------------------------------------------------------------------------|--------------------------------------------------------------------------------------------------------------------------------------------------------------------------------|----------------------------------------------------------------------------------------------------------------------------------------------------------------------------------------------------------------------------------------------------------------------|----------------------------------------------------------------------------------------------------------------------------------------------------------------------------------------------------------------------------------------------------------------------------------------------------------------------------------------------------------------------------------------------------------------------------------------------------------------------------------------------------------------------------------------------------------------------------------------------------------|
| <b>Jacobi, 2009 continued</b> | Eur J Epidemiol. 2009; 24(4):171-9. Epub 2009 Mar 13.        | n= 141 (160), 18-74 years, low habitual PA levels                      | ActiGraph (model 7164, Manufacturing Technology, Inc., FL, USA)                       | 7 consecutive days, 1 min epochs, worn on nylon pouch, on a belt, around waist, during all waking hours, min 4 days, min 8h/d                                                  | Modifiable AQ (MAQ) French version, past year PA leisure time & work, as well as sedentary behavior, all non-occupational non-leisure PA was added to the original Qu.                                                                                               | <b>total PA (counts/d) vs. total activity (METh/week)</b><br>$\rho = 0.39$ $P < 0.01$<br><b>all:</b><br><b>total PA (counts/d) - total leisure time PA:</b><br>$\rho = 0.19$ ( $P < 0.05$ ) (h/week), $\rho = 0.09$ (METh/week)<br><b>total PA (counts/d) - moderate intensity leisure time PA:</b><br>$\rho = 0.14$ ( $P < 0.1$ ) (h/week), $\rho = 0.14$ ( $P < 0.1$ ) (METh/week)<br><b>total PA (counts/d) - vigorous intensity leisure time PA:</b><br>$\rho = -0.02$ (h/week), $\rho = -0.02$ (METh/week)<br><b>total PA (counts/d) vs. total activity (METh/week)</b><br>$\rho = 0.18$ $P < 0.05$ |
| <b>Li, 2009</b>               | Eur J Clin Nutr. 2009 Dec; 63(12):1448-51. Epub 2009 Jul 29. | n= 369, 65 +/- 6 non-diabetic subgroup of Malmö Diet and Cancer cohort | Computer Science and Application's Inc. (Shalimar, FL) accelerometer (CSA model 7164) | 4 consecutive days, during waking hours, total no. of activity counts categorized as gender specific quintiles: low, quintile 1; moderate, quintile 2-4; high, quintile 5      | Leisure time comprehensive questionnaire (MDC-score), 18 questions range of 4 seasons (past year), simple leisure time questionnaire (past year), categorized as low (sedentary), moderate (light exercise $\geq 4$ h/week), high (regular exercise $\geq 3$ h/week) | Spearman correlation<br><b>MDC-score - CSA:</b><br>men: $\rho = 0.35$ $P < 0.01$<br>women: $r = 0.24$ $P < 0.01$<br><b>Simple-score-CSA:</b><br>men: $\rho = 0.32$ $P < 0.01$<br>women: $\rho = 0.15$ $P < 0.05$                                                                                                                                                                                                                                                                                                                                                                                         |
| <b>Emaus, 2010</b>            | Scand J Public Health. 2010 Nov; 38(5 Suppl):105-18.         | n= 270 (138 women, 132 men), 30-87 years                               | ActiGraph GT1M                                                                        | 7 consecutive days during waking hours, on elastic belt on right hip, start time programmed to 07.00 am, Min. 10 hours/d, 15s epochs, integrated to 1 minute for data analysis | Questionnaires used in Tromso survey, leisure activity and work activity                                                                                                                                                                                             | Spearman correlation<br><b>Correlation Qu (leisure activity) vs. Acc activity:</b><br><u>women</u><br>$\rho = 0.23$ , $p < 0.05$ (overall activity), $\rho = -0.22$ , $p < 0.05$ (light PA),<br>$\rho = 0.28$ , $p < 0.01$ (MVPA), $\rho = 0.27$ , $p < 0.01$ (vigorous PA)<br><u>men</u><br>$\rho = 0.23$ , $p < 0.01$ (overall activity), $\rho = -0.23$ , $p < 0.05$ (light PA),<br>$\rho = 0.25$ , $p < 0.01$ (MVPA), $\rho = 0.29$ , $p < 0.01$ (vigorous PA)                                                                                                                                       |

---

**Additional File 1. Summary of correlations of physical activity data assessed by questionnaires and accelerometers with respect to Gender (continued)**

---

| <i>Study</i>                 | <i>Journal</i>                                            | <i>No. of Participants</i>                  | <i>Accelerometer used</i>                | <i>Accelerometer wear method</i>                                                                                                                                                                     | <i>Questionnaire used in investigation</i>                                                                                                                                                                                                                                                                                                                                                                | <i>Results</i>                                                                                                                                                                                                                                                                                                                                 |
|------------------------------|-----------------------------------------------------------|---------------------------------------------|------------------------------------------|------------------------------------------------------------------------------------------------------------------------------------------------------------------------------------------------------|-----------------------------------------------------------------------------------------------------------------------------------------------------------------------------------------------------------------------------------------------------------------------------------------------------------------------------------------------------------------------------------------------------------|------------------------------------------------------------------------------------------------------------------------------------------------------------------------------------------------------------------------------------------------------------------------------------------------------------------------------------------------|
| <b>Emaus, 2010 continued</b> | Scand J Public Health. 2010 Nov; 38(5 Suppl):105-18.      | n= 270 (138 women, 132 men), 30-87 years    | ActiGraph GT1M                           | 7 consecutive days during waking hours, on elastic belt on right hip, start time programmed to 07.00 am, Min. 10 hours/d, 15s epochs, integrated to 1 minute for data analysis                       | Questionnaires used in Tromso survey, leisure activity and work activity                                                                                                                                                                                                                                                                                                                                  | <b>Correlation Qu PA (work) vs. AccPA:</b><br><u>women</u><br>$\rho = 0.11$ (overall activity), $\rho = 0.40$ , $p < 0.001$ (light PA), $\rho = 0.05$ (MVPA), $\rho = -0.13$ (vigorous PA)<br><u>men</u><br>$\rho = 0.08$ (overall activity), $\rho = 0.29$ , $p < 0.01$ (light PA), $\rho = 0.04$ (MVPA), $\rho = -0.15$ (vigorous PA)        |
| <b>Rosenberg, 2010</b>       | Journal of Physical Activity and Health, 2010, 7, 697-705 | n= 654 (accelerometer) (300 women, 354 men) | ActiGraph accelerometer (model WAM 7164) | 7 days, during waking hours, attached on nylon belt around waist, on right hip, 1 min epochs, 1 valid hour -> consecutive minutes of zero counts $\leq 30$ minutes, min 3 days, min 10 hours per day | The Sedentary Behavior Questionnaire (SBQ), assesses amount of time spent: watching TV, playing computer/video games, sitting while listening to music, sitting and talking on the phone, doing paperwork or office work, sitting and reading, playing a musical instrument, doing arts and crafts, sitting and driving/riding in a car, bus or train), completely separate for weekdays and weekend days | Partial correlations for overweight samples<br><br><b>SBQ score vs. Accelerometer total activity mins/day</b><br>$r = -0.03$ men (total hours/week)<br>$r = 0.10$ women (total hours/week)<br><br><b>SBQ score vs. Accelerometer minutes with counts &lt; 100</b><br>$r = -0.01$ men (total hours/week)<br>$r = 0.10$ women (total hours/week) |

---

**Additional File 1. Summary of correlations of physical activity data assessed by questionnaires and accelerometers with respect to Gender (continued)**

| <i>Study</i>         | <i>Journal</i>                                                         | <i>No. of Participants</i>                                                       | <i>Accelerometer used</i>                                      | <i>Accelerometer wear method</i>                                                                                                                                                   | <i>Questionnaire used in investigation</i>                                                                                                                                                                                                                                               | <i>Results</i>                                                                                                                                                                                                                                                                                                                                                                                                                                                                                                                                                                                                                                                                                                                                                                                                                                                                                                                                                                                                                                                                                                                                                                                                                                                                                                                                                                                                                |
|----------------------|------------------------------------------------------------------------|----------------------------------------------------------------------------------|----------------------------------------------------------------|------------------------------------------------------------------------------------------------------------------------------------------------------------------------------------|------------------------------------------------------------------------------------------------------------------------------------------------------------------------------------------------------------------------------------------------------------------------------------------|-------------------------------------------------------------------------------------------------------------------------------------------------------------------------------------------------------------------------------------------------------------------------------------------------------------------------------------------------------------------------------------------------------------------------------------------------------------------------------------------------------------------------------------------------------------------------------------------------------------------------------------------------------------------------------------------------------------------------------------------------------------------------------------------------------------------------------------------------------------------------------------------------------------------------------------------------------------------------------------------------------------------------------------------------------------------------------------------------------------------------------------------------------------------------------------------------------------------------------------------------------------------------------------------------------------------------------------------------------------------------------------------------------------------------------|
| <b>Evenson, 2010</b> | Intl Journal of Behavioral Nutrition and Physical Activity. 2010. 7:21 | 177 pregnant women (for validity assessment), n=120 with complete Actigraph data | MTI Actigraph accelerometer (7164 model) Fort Walton Beach, FL | waking hours for 7 days. Remove for sleeping, bathing, and swimming, 1 minute epochs, complete data with non-missing counts over 70% of a standard measurement day for all 7 days. | PIN3 Physical Activity Questionnaire. One-week recall. Interviewer administered, capturing moderate and vigorous physical activity<br><br>PIN3 Diary Card used to assess concurrent related validity of the questionnaire. Filled out on a daily basis to be mailed back after the week. | <p><b>Total physical activity in MET-hours/week- total counts/week:</b><br/>Complete Actigraph sample (120): 0.31 (0.13 - 0.49)</p> <p><b>Moderate PA hours/week (Qu) - hours/week (Acc)</b><br/>3-6 METs<br/>0.07 (-0.11, 0.24) Freedson et. al*<br/>0.24 (0.05, 0.43) Schwartz et. al*<br/>0.06 (-0.12, 0.24) Troiano et. al*<br/>4.8-7.1 METs<br/>0.05 (-0.14, 0.24) Freedson et. al*<br/>0.05 (-0.13, 0.23) Schwartz et. al*<br/>0.04 (-0.15, 0.22) Troiano et. al*</p> <p><b>Vigorous PA hours/week (Qu) - hours/week (Acc)</b><br/>3-6 METs<br/>0.38 (0.20, 0.56) Freedson et. al*<br/>0.44 (0.28, 0.60) Schwartz et. al*<br/>0.40 (0.22, 0.57) Troiano et. al*<br/>4.8-7.1 METs<br/>0.32 (0.14, 0.51) Freedson et. al*<br/>0.32 (0.14, 0.50) Schwartz et. al*<br/>0.34 (0.15, 0.52) Troiano et. al*</p> <p><b>MVPA hours/week (Qu) - hours/week (Acc)</b><br/>3-6 METs<br/>0.17 (0.004, 0.35) Freedson et. al*<br/>0.32 (0.14, 0.50) Schwartz et. al*<br/>0.16 (-0.01, 0.34) Troiano et. al*<br/>0.32 (0.14, 0.50) total counts/week<br/>4.8-7.1 METs<br/>0.20 (0.02, 0.38) Freedson et. al*<br/>0.21 (0.04, 0.38) Schwartz et. al*<br/>0.19 (0.01, 0.37) Troiano et. al*<br/>0.21 (0.04, 0.38) total counts/week<br/>*Freedson et. al: 1952-5724 (Moderate); &gt; = 5725 (Vigorous)<br/>Swartz et al: 574-4944 (Moderate); &gt; = 4945 (Vigorous)<br/>Troiano et al: 2020-5998 (Moderate); &gt; = 5999 (Vigorous)</p> |



**Additional File 1. Summary of correlations of physical activity data assessed by questionnaires and accelerometers with respect to Gender (continued)**

| <i>Study</i>                   | <i>Journal</i>                               | <i>No. of Participants</i>      | <i>Accelerometer used</i>                                                           | <i>Accelerometer wear method</i>                                                                                                                                                                 | <i>Questionnaire used in investigation</i>                                                             | <i>Results</i>                                                                                                                                                                                                                                                                                                                                                                                                                                                                                                                                                                                                                                                                                                                                                                                                                                                                                                                                                                                                                                                                                                                                                                                                                                                                                                                                                                                                                                                                                                              |
|--------------------------------|----------------------------------------------|---------------------------------|-------------------------------------------------------------------------------------|--------------------------------------------------------------------------------------------------------------------------------------------------------------------------------------------------|--------------------------------------------------------------------------------------------------------|-----------------------------------------------------------------------------------------------------------------------------------------------------------------------------------------------------------------------------------------------------------------------------------------------------------------------------------------------------------------------------------------------------------------------------------------------------------------------------------------------------------------------------------------------------------------------------------------------------------------------------------------------------------------------------------------------------------------------------------------------------------------------------------------------------------------------------------------------------------------------------------------------------------------------------------------------------------------------------------------------------------------------------------------------------------------------------------------------------------------------------------------------------------------------------------------------------------------------------------------------------------------------------------------------------------------------------------------------------------------------------------------------------------------------------------------------------------------------------------------------------------------------------|
| <b>Hagstromer et al., 2010</b> | J Phys Act Health. 2010 Jul;7(4):541-50      | N=980, 18-65 years              | Actigraph MT1 model 7164 (Manufacturing Technology Inc, Fort Walton Beach, FL, USA) | 7 consecutive days, at least 4 days with at least 10 hours, at least 1 weekend day                                                                                                               | IPAQ long form                                                                                         | <p>Spearman's Rank correlation coefficient between IPAQ and accelerometer</p> <p><b>Moderate activity</b> <math>\rho=0.27, P&lt;0.01</math><br/> Men: <math>\rho=0.32, P&lt;0.05</math><br/> Women: <math>\rho=0.22, P&lt;0.01</math></p> <p><b>Vigorous activity</b> <math>\rho=0.31, P&lt;0.01</math><br/> Men: <math>\rho=0.31, P&lt;0.01</math><br/> Women: <math>\rho=0.29, P&lt;0.01</math></p> <p><b>Total activity</b> <math>\rho=0.28, P&lt;0.01</math><br/> Men: <math>\rho=0.30, P&lt;0.01</math><br/> Women: <math>\rho=0.27, P&lt;0.01</math></p>                                                                                                                                                                                                                                                                                                                                                                                                                                                                                                                                                                                                                                                                                                                                                                                                                                                                                                                                                              |
| <b>Lee, 2011</b>               | Int J Behav Nutr Phys Act. 2011 Aug 1; 8:81. | n= 1270 (42.9 $\pm$ 14.4 years) | ActiGraph GT1M                                                                      | 4 consecutive days, around waist, 2 weekdays+2 weekend days, during waking hours, first day always Thursday, Friday, Saturday), less than 600 min of registered time/day-> invalid, 1 min epoch, | IPAQ-C, short form (9items vs. 31items long form), equivalent psychometric properties to the long form | <p>Spearman correlation</p> <p><b>IPAQ-C (moderate PA) vs. Acc (min in moderate PA)</b><br/> <math>\rho=0.10, P&lt;0.05</math> <u>men</u>; <math>\rho=0.09, P&lt;0.05</math> <u>women</u><br/> <math>\rho=0.05</math> <u><math>\leq 29</math> years</u>; <math>\rho=0.09</math> <u>30-49 years</u>; <math>\rho=P&lt;0.05</math> <u><math>\geq 50</math> years</u><br/> <math>\rho=0.10</math> <u>BMI <math>\geq 25</math></u>; <math>\rho=0.09, P&lt;0.01</math> <u>BMI <math>&lt; 25</math></u></p> <p><b>IPAQ-C (vigorous PA) vs. Acc (min in vigorous PA)</b><br/> <math>\rho=0.23, P&lt;0.001</math> <u>men</u>; <math>\rho=0.09, P&lt;0.05</math> <u>women</u><br/> <math>\rho=0.21, P&lt;0.001</math> <u><math>&lt; 29</math> years</u>; <math>\rho=0.12, P&lt;0.01</math> <u>30-49 years</u>;<br/> <math>\rho=P&lt;0.01</math> <u><math>\geq 50</math> years</u><br/> <math>\rho=0.22, P&lt;0.001</math> <u>BMI <math>\geq 25</math></u>; <math>\rho=0.14, P&lt;0.001</math> <u>BMI <math>&lt; 25</math></u></p> <p><b>IPAQ-C (total MET) vs. Acc (counts/h)</b><br/> <math>\rho=0.18, P&lt;0.001</math> <u>men</u>; <math>\rho=0.15, P&lt;0.001</math> <u>women</u><br/> <math>\rho=0.04</math> <u><math>\leq 29</math> years</u>; <math>\rho=0.19, P&lt;0.001</math> <u>30-49 years</u>;<br/> <math>\rho=0.25, P&lt;0.001</math> <u><math>\geq 50</math> years</u><br/> <math>\rho=0.21, P&lt;0.001</math> <u>BMI <math>\geq 25</math></u>; <math>\rho=0.14, P&lt;0.001</math> <u>BMI <math>&lt; 25</math></u></p> |

**Additional File 1. Summary of correlations of physical activity data assessed by questionnaires and accelerometers with respect to Gender (continued)**

| <b>Study</b>         | <b>Journal</b>                                          | <b>No. of Participants</b>            | <b>Accelerometer used</b>                                           | <b>Accelerometer wear method</b>                                                                                                                                                                                     | <b>Questionnaire used in investigation</b>                                                                                                      | <b>Results</b>                                                                                                                                                                                                                                                                                                                                                                                                                                                                                                                                                                                                                                                                                                                                                                                                                  |
|----------------------|---------------------------------------------------------|---------------------------------------|---------------------------------------------------------------------|----------------------------------------------------------------------------------------------------------------------------------------------------------------------------------------------------------------------|-------------------------------------------------------------------------------------------------------------------------------------------------|---------------------------------------------------------------------------------------------------------------------------------------------------------------------------------------------------------------------------------------------------------------------------------------------------------------------------------------------------------------------------------------------------------------------------------------------------------------------------------------------------------------------------------------------------------------------------------------------------------------------------------------------------------------------------------------------------------------------------------------------------------------------------------------------------------------------------------|
| <b>Tomioka, 2011</b> | J Epidemiol. 2011 Nov 5; 21(6):459-65. Epub 2011 Sep 24 | 325 (164 men, 161 women), >=65 years, | Kenz Lifecorder PLUS, Suzuken Co., Ltd., Nagoya, Japan              | Left or right hip, on waist belt, ≥ 2 weeks (preferably 4 weeks), starting on day after 1st IPAQ, 2nd IPAQ on 14th day of accelerometer wear, during waking hours                                                    | IPAQ short form, twice, 2 weeks apart, 2 different sets of MET values: 1. original IPAQ values, 2. modified for use with elderly                | Spearman correlation<br><b>Acc (total PA in METmin/week) vs. IPAQ (total PA in METmin/week)</b><br><u>65-74</u> : ρ= 0.42 <u>men</u> , ρ=0.49 <u>women</u><br><u>75-89</u> : ρ= 0.53 <u>men</u> , ρ= 0.49 <u>women</u> all P< 0.01<br><b>Acc (total PA in METmin/week) vs. IPAQ (vigorous PA min/week)</b><br><u>65-74</u> : ρ= 0.25 <u>men</u> , P< 0.05, ρ= 0.12 <u>women</u><br><u>75-89</u> : ρ= 0.17 <u>men</u> , ρ= 0.17 <u>women</u><br><b>Acc (total PA in METmin/week) vs. IPAQ (moderate PA min/week)</b><br><u>65-74</u> : ρ= 0.26 <u>men</u> , P< 0.05, ρ= 0.13 <u>women</u><br><u>75-89</u> : ρ= 0.05 <u>men</u> , ρ= 0.03 <u>women</u>                                                                                                                                                                            |
| <b>Nang, 2011</b>    | BMC Med Res Methodol. 2011 Oct 13;11:141                | 152 adults (21+ years)                | Actical physical activity monitor (Mini Mitter Co., Inc., Bend, OR) | 5 consecutive days, right hip with elastic belts, 3 weekdays, 2 weekend days, 15sec epochs, converted to 1min epochs for analysis of energy expenditure, accelerometer data considered valid if: ≥10 hours/d, 5 days | IPAQ, 120 participants before measurement and immediately afterwards, SP2PAQ (Singapore Prospective Study Program PAQ), 43 the other way around | Spearman correlation<br><b>IPAQ-Acc:</b><br>r= 0.13/ 0.15 corrected (moderate activity),<br>r= 0.18/ 0.31 corrected (vigorous activity), p< 0.05,<br>r= 0.19 (combined)<br><u>age ≤ 40:</u><br>0.08/ 0.09 corrected (moderate),<br>0.30/ 0.52 corrected (vigorous), p<0.05<br><u>age &gt;40:</u><br>r= 0.21/ 0.24 corrected (moderate),<br>r= -0.07/ -0.01 corrected (vigorous)<br><u>male:</u><br>r= 0.24/ 0.27 corrected (moderate),<br>r= 0.28/ 0.48 corrected (vigorous)<br><u>female:</u><br>r= 0.12/ 0.13 corrected (moderate),<br>r= 0.05/ 0.09 corrected (vigorous)<br><b>SP2PAQ-Acc:</b><br>r= 0.24/ 0.27 corrected (moderate activity),p< 0.05,<br>r= 0.42, p< 0.0001/ 0.73, p< 0.05 corrected (vigorous activity),<br>p< 0.05, r= 0.19 (combined)<br><u>age ≤ 40:</u><br>r= 0.21/ 0.24 corrected, p< 0.05 (moderate) |

**Additional File 1. Summary of correlations of physical activity data assessed by questionnaires and accelerometers with respect to Gender (continued)**

| <i>Study</i>      | <i>Journal</i>                           | <i>No. of Participants</i>                                                          | <i>Accelerometer used</i>                                           | <i>Accelerometer wear method</i>                                                                                                                                                                                           | <i>Questionnaire used in investigation</i>                                                                                                                                                                                                                                   | <i>Results</i>                                                                                                                                                                                                                                                                                                                                                                                                                                                                              |
|-------------------|------------------------------------------|-------------------------------------------------------------------------------------|---------------------------------------------------------------------|----------------------------------------------------------------------------------------------------------------------------------------------------------------------------------------------------------------------------|------------------------------------------------------------------------------------------------------------------------------------------------------------------------------------------------------------------------------------------------------------------------------|---------------------------------------------------------------------------------------------------------------------------------------------------------------------------------------------------------------------------------------------------------------------------------------------------------------------------------------------------------------------------------------------------------------------------------------------------------------------------------------------|
| <b>Nang, 2011</b> | BMC Med Res Methodol. 2011 Oct 13;11:141 | 152 adults (21+ years)                                                              | Actical physical activity monitor (Mini Mitter Co., Inc., Bend, OR) | 5 consecutive days, right hip with elastic belts, 3 weekdays, 2 weekend days, 15sec epochs, converted to 1min epochs for analysis of energy expenditure, accelerometer data considered valid if: $\geq 10$ hours/d, 5 days | IPAQ, 120 participants before measurement and immediately afterwards, SP2PAQ (Singapore Prospective Study Program PAQ), 43 the other way around                                                                                                                              | $r = 0.48$ , $p < 0.0001$ / $0.83$ corrected (vigorous), $p < 0.05$ <u>age &gt;40</u> :<br>$r = 0.27$ / $0.30$ corrected (moderate);<br>$r = 0.48$ , $p < 0.0015$ / $0.85$ corrected (vigorous) <u>male</u> :<br>$r = 0.16$ / $0.18$ corrected (moderate) $p < 0.05$ ,<br>$r = 0.34$ / $0.59$ corrected (vigorous) $p < 0.05$ <u>female</u> :<br>$0.29$ / $0.33$ corrected (moderate),<br>$0.05$ / $0.09$ corrected (vigorous)<br>corrected: for within-person variation in acc measurement |
| <b>Lee, 2011</b>  | J Community Health; 26 April 2011        | 262 African American women, 148 Hispanic or Latina women from Health Is Power study | Uni-directional ActiGraph GT1M accelerometer Pensacola, FL          | Wear for 7 days at all times except for in the shower or sleeping – included a log to record times put on and taken off each day.                                                                                          | IPAQ – interviewer- administered baseline health assessment for the last 7 days. MET-minutes per week<br><br>CALQ (Check And Line Questionnaire) – self reported for 7 days. Measures number of 15-minute physical activity sessions and determines continuity and intensity | Spearman’s Rho:<br><b>IPAQ work:</b> 0.078<br><b>IPAQ transportation:</b> 0.109<br><b>IPAQ domestic:</b> -0.026<br><b>IPAQ leisure:</b> 0.026<br><b>IPAQ walking:</b> 0.077<br><b>IPAQ moderate:</b> -0.022<br><b>IPAQ vigorous:</b> 0.037<br><b>IPAQ total PA:</b> 0.059<br>[IPAQ and CALQ were significantly correlated only for transportation (0.118), leisure (0.119), and vigorous (0.115)]<br>Pearson’s r:<br>CALQ to Accelerometer: 0.186 ( $p < 0.05$ )                            |

**Additional File 1. Summary of correlations of physical activity data assessed by questionnaires and accelerometers with respect to Gender (continued)**

| <i>Study</i>       | <i>Journal</i>                                             | <i>No. of Participants</i>                                                                           | <i>Accelerometer used</i>                           | <i>Accelerometer wear method</i>                                                                       | <i>Questionnaire used in investigation</i>                                                                 | <i>Results</i>                                                                                                                                                                                                                                                                                                                                                                                                                                                                                                                                                                                                                                                                                                                                                                                                                                                                                                                                                                                                                                                                                                                                                                                                                                                                                                                                                                                                                                                   |      |     |     |       |     |         |           |        |         |         |          |                    |       |       |       |         |                  |       |         |         |          |          |       |       |       |          |      |         |       |         |      |     |     |       |     |         |           |  |  |  |          |                    |       |       |       |         |                  |       |         |         |          |          |       |       |       |          |      |       |       |       |
|--------------------|------------------------------------------------------------|------------------------------------------------------------------------------------------------------|-----------------------------------------------------|--------------------------------------------------------------------------------------------------------|------------------------------------------------------------------------------------------------------------|------------------------------------------------------------------------------------------------------------------------------------------------------------------------------------------------------------------------------------------------------------------------------------------------------------------------------------------------------------------------------------------------------------------------------------------------------------------------------------------------------------------------------------------------------------------------------------------------------------------------------------------------------------------------------------------------------------------------------------------------------------------------------------------------------------------------------------------------------------------------------------------------------------------------------------------------------------------------------------------------------------------------------------------------------------------------------------------------------------------------------------------------------------------------------------------------------------------------------------------------------------------------------------------------------------------------------------------------------------------------------------------------------------------------------------------------------------------|------|-----|-----|-------|-----|---------|-----------|--------|---------|---------|----------|--------------------|-------|-------|-------|---------|------------------|-------|---------|---------|----------|----------|-------|-------|-------|----------|------|---------|-------|---------|------|-----|-----|-------|-----|---------|-----------|--|--|--|----------|--------------------|-------|-------|-------|---------|------------------|-------|---------|---------|----------|----------|-------|-------|-------|----------|------|-------|-------|-------|
| <b>Grimm, 2012</b> | J Aging Phys Act. 2012 Jan;20(1):64-79                     | n= 127, 50-87 years, self-reported being healthy, no limitations for engaging in physical activities | The ActiGraph 7164 (ActiGraph, LLC Pensacola, FL)   | 7 consecutive days, on elastic belt, over right hip, during all waking hours (except water activities) | IPAQ                                                                                                       | <p>Spearman rank-order correlations <b>IPAQ (min/day) - Acc (min/day)</b></p> <p><b>accumulated Acc minutes</b></p> <table border="1"> <thead> <tr> <th>IPAQ</th> <th>Acc</th> <th>Men</th> <th>women</th> <th>all</th> </tr> </thead> <tbody> <tr> <td>sitting</td> <td>sedentary</td> <td>0.404*</td> <td>0.336**</td> <td>0.357**</td> </tr> <tr> <td>moderate</td> <td>moderate lifestyle</td> <td>0.288</td> <td>0.137</td> <td>0.164</td> </tr> <tr> <td>walking</td> <td>moderate walking</td> <td>0.262</td> <td>0.316**</td> <td>0.294**</td> </tr> <tr> <td>vigorous</td> <td>vigorous</td> <td>0.217</td> <td>0.153</td> <td>0.176</td> </tr> <tr> <td>total PA</td> <td>MVPA</td> <td>0.440**</td> <td>0.180</td> <td>0.237**</td> </tr> </tbody> </table> <p><b>bout Acc minutes</b></p> <table border="1"> <thead> <tr> <th>IPAQ</th> <th>Acc</th> <th>Men</th> <th>women</th> <th>all</th> </tr> </thead> <tbody> <tr> <td>sitting</td> <td>sedentary</td> <td></td> <td></td> <td></td> </tr> <tr> <td>moderate</td> <td>moderate lifestyle</td> <td>0.051</td> <td>0.050</td> <td>0.042</td> </tr> <tr> <td>walking</td> <td>moderate walking</td> <td>0.138</td> <td>0.391**</td> <td>0.276**</td> </tr> <tr> <td>vigorous</td> <td>vigorous</td> <td>0.175</td> <td>0.131</td> <td>0.166</td> </tr> <tr> <td>total PA</td> <td>MVPA</td> <td>0.275</td> <td>0.126</td> <td>0.169</td> </tr> </tbody> </table> <p>*P&lt;0.05, **P&lt; 0.01</p> | IPAQ | Acc | Men | women | all | sitting | sedentary | 0.404* | 0.336** | 0.357** | moderate | moderate lifestyle | 0.288 | 0.137 | 0.164 | walking | moderate walking | 0.262 | 0.316** | 0.294** | vigorous | vigorous | 0.217 | 0.153 | 0.176 | total PA | MVPA | 0.440** | 0.180 | 0.237** | IPAQ | Acc | Men | women | all | sitting | sedentary |  |  |  | moderate | moderate lifestyle | 0.051 | 0.050 | 0.042 | walking | moderate walking | 0.138 | 0.391** | 0.276** | vigorous | vigorous | 0.175 | 0.131 | 0.166 | total PA | MVPA | 0.275 | 0.126 | 0.169 |
| IPAQ               | Acc                                                        | Men                                                                                                  | women                                               | all                                                                                                    |                                                                                                            |                                                                                                                                                                                                                                                                                                                                                                                                                                                                                                                                                                                                                                                                                                                                                                                                                                                                                                                                                                                                                                                                                                                                                                                                                                                                                                                                                                                                                                                                  |      |     |     |       |     |         |           |        |         |         |          |                    |       |       |       |         |                  |       |         |         |          |          |       |       |       |          |      |         |       |         |      |     |     |       |     |         |           |  |  |  |          |                    |       |       |       |         |                  |       |         |         |          |          |       |       |       |          |      |       |       |       |
| sitting            | sedentary                                                  | 0.404*                                                                                               | 0.336**                                             | 0.357**                                                                                                |                                                                                                            |                                                                                                                                                                                                                                                                                                                                                                                                                                                                                                                                                                                                                                                                                                                                                                                                                                                                                                                                                                                                                                                                                                                                                                                                                                                                                                                                                                                                                                                                  |      |     |     |       |     |         |           |        |         |         |          |                    |       |       |       |         |                  |       |         |         |          |          |       |       |       |          |      |         |       |         |      |     |     |       |     |         |           |  |  |  |          |                    |       |       |       |         |                  |       |         |         |          |          |       |       |       |          |      |       |       |       |
| moderate           | moderate lifestyle                                         | 0.288                                                                                                | 0.137                                               | 0.164                                                                                                  |                                                                                                            |                                                                                                                                                                                                                                                                                                                                                                                                                                                                                                                                                                                                                                                                                                                                                                                                                                                                                                                                                                                                                                                                                                                                                                                                                                                                                                                                                                                                                                                                  |      |     |     |       |     |         |           |        |         |         |          |                    |       |       |       |         |                  |       |         |         |          |          |       |       |       |          |      |         |       |         |      |     |     |       |     |         |           |  |  |  |          |                    |       |       |       |         |                  |       |         |         |          |          |       |       |       |          |      |       |       |       |
| walking            | moderate walking                                           | 0.262                                                                                                | 0.316**                                             | 0.294**                                                                                                |                                                                                                            |                                                                                                                                                                                                                                                                                                                                                                                                                                                                                                                                                                                                                                                                                                                                                                                                                                                                                                                                                                                                                                                                                                                                                                                                                                                                                                                                                                                                                                                                  |      |     |     |       |     |         |           |        |         |         |          |                    |       |       |       |         |                  |       |         |         |          |          |       |       |       |          |      |         |       |         |      |     |     |       |     |         |           |  |  |  |          |                    |       |       |       |         |                  |       |         |         |          |          |       |       |       |          |      |       |       |       |
| vigorous           | vigorous                                                   | 0.217                                                                                                | 0.153                                               | 0.176                                                                                                  |                                                                                                            |                                                                                                                                                                                                                                                                                                                                                                                                                                                                                                                                                                                                                                                                                                                                                                                                                                                                                                                                                                                                                                                                                                                                                                                                                                                                                                                                                                                                                                                                  |      |     |     |       |     |         |           |        |         |         |          |                    |       |       |       |         |                  |       |         |         |          |          |       |       |       |          |      |         |       |         |      |     |     |       |     |         |           |  |  |  |          |                    |       |       |       |         |                  |       |         |         |          |          |       |       |       |          |      |       |       |       |
| total PA           | MVPA                                                       | 0.440**                                                                                              | 0.180                                               | 0.237**                                                                                                |                                                                                                            |                                                                                                                                                                                                                                                                                                                                                                                                                                                                                                                                                                                                                                                                                                                                                                                                                                                                                                                                                                                                                                                                                                                                                                                                                                                                                                                                                                                                                                                                  |      |     |     |       |     |         |           |        |         |         |          |                    |       |       |       |         |                  |       |         |         |          |          |       |       |       |          |      |         |       |         |      |     |     |       |     |         |           |  |  |  |          |                    |       |       |       |         |                  |       |         |         |          |          |       |       |       |          |      |       |       |       |
| IPAQ               | Acc                                                        | Men                                                                                                  | women                                               | all                                                                                                    |                                                                                                            |                                                                                                                                                                                                                                                                                                                                                                                                                                                                                                                                                                                                                                                                                                                                                                                                                                                                                                                                                                                                                                                                                                                                                                                                                                                                                                                                                                                                                                                                  |      |     |     |       |     |         |           |        |         |         |          |                    |       |       |       |         |                  |       |         |         |          |          |       |       |       |          |      |         |       |         |      |     |     |       |     |         |           |  |  |  |          |                    |       |       |       |         |                  |       |         |         |          |          |       |       |       |          |      |       |       |       |
| sitting            | sedentary                                                  |                                                                                                      |                                                     |                                                                                                        |                                                                                                            |                                                                                                                                                                                                                                                                                                                                                                                                                                                                                                                                                                                                                                                                                                                                                                                                                                                                                                                                                                                                                                                                                                                                                                                                                                                                                                                                                                                                                                                                  |      |     |     |       |     |         |           |        |         |         |          |                    |       |       |       |         |                  |       |         |         |          |          |       |       |       |          |      |         |       |         |      |     |     |       |     |         |           |  |  |  |          |                    |       |       |       |         |                  |       |         |         |          |          |       |       |       |          |      |       |       |       |
| moderate           | moderate lifestyle                                         | 0.051                                                                                                | 0.050                                               | 0.042                                                                                                  |                                                                                                            |                                                                                                                                                                                                                                                                                                                                                                                                                                                                                                                                                                                                                                                                                                                                                                                                                                                                                                                                                                                                                                                                                                                                                                                                                                                                                                                                                                                                                                                                  |      |     |     |       |     |         |           |        |         |         |          |                    |       |       |       |         |                  |       |         |         |          |          |       |       |       |          |      |         |       |         |      |     |     |       |     |         |           |  |  |  |          |                    |       |       |       |         |                  |       |         |         |          |          |       |       |       |          |      |       |       |       |
| walking            | moderate walking                                           | 0.138                                                                                                | 0.391**                                             | 0.276**                                                                                                |                                                                                                            |                                                                                                                                                                                                                                                                                                                                                                                                                                                                                                                                                                                                                                                                                                                                                                                                                                                                                                                                                                                                                                                                                                                                                                                                                                                                                                                                                                                                                                                                  |      |     |     |       |     |         |           |        |         |         |          |                    |       |       |       |         |                  |       |         |         |          |          |       |       |       |          |      |         |       |         |      |     |     |       |     |         |           |  |  |  |          |                    |       |       |       |         |                  |       |         |         |          |          |       |       |       |          |      |       |       |       |
| vigorous           | vigorous                                                   | 0.175                                                                                                | 0.131                                               | 0.166                                                                                                  |                                                                                                            |                                                                                                                                                                                                                                                                                                                                                                                                                                                                                                                                                                                                                                                                                                                                                                                                                                                                                                                                                                                                                                                                                                                                                                                                                                                                                                                                                                                                                                                                  |      |     |     |       |     |         |           |        |         |         |          |                    |       |       |       |         |                  |       |         |         |          |          |       |       |       |          |      |         |       |         |      |     |     |       |     |         |           |  |  |  |          |                    |       |       |       |         |                  |       |         |         |          |          |       |       |       |          |      |       |       |       |
| total PA           | MVPA                                                       | 0.275                                                                                                | 0.126                                               | 0.169                                                                                                  |                                                                                                            |                                                                                                                                                                                                                                                                                                                                                                                                                                                                                                                                                                                                                                                                                                                                                                                                                                                                                                                                                                                                                                                                                                                                                                                                                                                                                                                                                                                                                                                                  |      |     |     |       |     |         |           |        |         |         |          |                    |       |       |       |         |                  |       |         |         |          |          |       |       |       |          |      |         |       |         |      |     |     |       |     |         |           |  |  |  |          |                    |       |       |       |         |                  |       |         |         |          |          |       |       |       |          |      |       |       |       |
| <b>Kwak, 2012</b>  | J Phys Act Health. 2012 Nov;9(8):1130-7. Epub 2011 Dec 27. | N=440, mean age=49.4 years, 44% males                                                                | ActiGraph GT1M (ActiGraph, Pensacola, Florida, USA) | 7 days, during waking hours, attached to the center of gravity                                         | International Physical Activity Questionnaire (IPAQ) long form, at least 4 days with at least 10 hours/day | <p>Spearman correlation<br/>IPAQ-L work vs. accelerometer (min/day)</p> <p><b>Total</b><br/>Accelerometer-MVPA-work: <math>\rho=0.46</math>, <math>P&lt;0.01</math><br/>Accelerometer-work: <math>\rho= 0.39</math>, <math>P&lt;0.01</math><br/>Accelerometer-total: <math>\rho= 0.26</math>, <math>P&lt;0.01</math></p> <p><b>Men</b><br/>Accelerometer-MVPA-work: <math>\rho=0.44</math>, <math>P&lt;0.01</math><br/>Accelerometer-work: <math>\rho= 0.33</math>, <math>P&lt;0.01</math><br/>Accelerometer-total: <math>\rho= 0.21</math>, <math>P&lt;0.01</math></p> <p><b>Women</b><br/>Accelerometer-MVPA-work: <math>\rho=0.49</math>, <math>P&lt;0.01</math><br/>Accelerometer-work: <math>\rho= 0.41</math>, <math>P&lt;0.01</math><br/>Accelerometer-total: <math>\rho= 0.36</math>, <math>P&lt;0.01</math></p> <p><b>BMI</b><br/>(&lt;25kg/m<sup>2</sup>) Accelerometer-MVPA-work: <math>\rho=0.44</math>, <math>P&lt;0.01</math><br/>Accelerometer-work: <math>\rho=0.41</math>, <math>P&lt;0.01</math><br/>Accelerometer-total: <math>\rho=0.36</math>, <math>P&lt;0.01</math></p>                                                                                                                                                                                                                                                                                                                                                                   |      |     |     |       |     |         |           |        |         |         |          |                    |       |       |       |         |                  |       |         |         |          |          |       |       |       |          |      |         |       |         |      |     |     |       |     |         |           |  |  |  |          |                    |       |       |       |         |                  |       |         |         |          |          |       |       |       |          |      |       |       |       |

**Additional File 1. Summary of correlations of physical activity data assessed by questionnaires and accelerometers with respect to Gender (continued)**

| <i>Study</i>                  | <i>Journal</i>                                             | <i>No. of Participants</i>                                                                                                                 | <i>Accelerometer used</i>                            | <i>Accelerometer wear method</i>                                                                                    | <i>Questionnaire used in investigation</i>                                                                                                                                                                                                                                                                                                                                                                                                                                                             | <i>Results</i>                                                                                                                                                                                                                                                                                                                                                                                                                                                    |
|-------------------------------|------------------------------------------------------------|--------------------------------------------------------------------------------------------------------------------------------------------|------------------------------------------------------|---------------------------------------------------------------------------------------------------------------------|--------------------------------------------------------------------------------------------------------------------------------------------------------------------------------------------------------------------------------------------------------------------------------------------------------------------------------------------------------------------------------------------------------------------------------------------------------------------------------------------------------|-------------------------------------------------------------------------------------------------------------------------------------------------------------------------------------------------------------------------------------------------------------------------------------------------------------------------------------------------------------------------------------------------------------------------------------------------------------------|
| <b>Kwak, 2012 (continued)</b> | J Phys Act Health. 2012 Nov;9(8):1130-7. Epub 2011 Dec 27. | N=440, mean age=49.4 years, 44% males                                                                                                      | ActiGraph GT1M (ActiGraph, Pensacola, Florida, USA)  | 7 days, during waking hours, attached to the center of gravity                                                      | International Physical Activity Questionnaire (IPAQ) long form, at least 4 days with at least 10 hours/day                                                                                                                                                                                                                                                                                                                                                                                             | (25-30 kg/m <sup>2</sup> ) Accelerometer-work: $\rho=0.55$ , $P<0.01$<br>Accelerometer-work: $\rho=0.43$ , $P<0.01$<br>Accelerometer-total: $\rho=0.28$ , $P<0.01$<br>( $\geq 30$ kg/m <sup>2</sup> ) Accelerometer-total: $\rho=0.27$ , $P<0.01$<br>Accelerometer-work: $\rho=0.26$ , n.s.<br>Accelerometer-total: $\rho=0.01$ , n.s.                                                                                                                            |
| <b>Mâsse, 2012</b>            | J Phys Act Health. 2012 Feb;9(2):237-48                    | Women, n=130 African American, n=130 Hispanic, 40-70 years, not suffering from any health conditions that would preclude them being active | CSA model 7164 (Computer Science Applications, Inc.) | 7 days, over right hip, during all waking hours (except water activities)                                           | <u>The Checklist questionnaire</u> , 64 items, household (24), yard (10), family (6), church/volunteer work (11), transportation (2), self-administered and partially interviewer-administered, assesses frequency and duration of PA, based on Minnesota Leisure Time PAQ<br><u>The Global questionnaire</u> , 8 items, interviewer-administered, assesses moderate to vigorous intensity activities for 6 domains of PA (occupation, household, yard, family, church/volunteer work, transportation) | <b>Checklist questionnaire - Accelerometer</b><br>METmin/day of moderate to vigorous intensity activity<br>- total accelerometer counts: $r=0.30$ , $P<0.05$<br>- total min $\geq 3$ METs (accelerometer): $r=0.23$ , $P<0.05$<br><br><b>Global questionnaire - Accelerometer</b><br>METmin/day of moderate to vigorous intensity activity<br>- total accelerometer counts: $r=0.23$ , $P<0.05$<br>- total min $\geq 3$ METs (accelerometer): $r=0.22$ , $P<0.05$ |
| <b>Sullivan 2012</b>          | Int J Behav Nutr Phys Act. 2012; 9: 13.                    | n= 157 Indians, factory workers and co-residence spouses                                                                                   | Actigraph 7164                                       | At least 4 full days during waking hours, min 10 hours per day, 1min epochs, on right hip (except water activities) | IMS-PAQ (Indian Migration Study), predominantly open questions, last one month                                                                                                                                                                                                                                                                                                                                                                                                                         | Spearman rank correlations IMS-PAQ – accelerometer<br>Total sample: $\rho=0.41$ $P<0.001$ (total activity)<br>$\rho=0.17$ $P<0.05$ (light activity)<br>$\rho=0.47$ $P<0.001$ (MVPA)<br>Men: $\rho=0.40$ $P<0.001$ (total activity)<br>$\rho=0.08$ (light activity)<br>$\rho=0.37$ $P<0.001$ (MVPA)<br>Women: $\rho=0.28$ (total activity)<br>$\rho=0.45$ $P<0.05$ (light activity)<br>$\rho=-0.01$ (MVPA)                                                         |

**Additional File 1. Summary of correlations of physical activity data assessed by questionnaires and accelerometers with respect to Gender (continued)**

| <i>Study</i>                | <i>Journal</i>                                                            | <i>No. of Participants</i>            | <i>Accelerometer used</i>                                       | <i>Accelerometer wear method</i>                                                                                                                 | <i>Questionnaire used in investigation</i>                                                          | <i>Results</i>                                                                                                                                                                                                                                                                                        |
|-----------------------------|---------------------------------------------------------------------------|---------------------------------------|-----------------------------------------------------------------|--------------------------------------------------------------------------------------------------------------------------------------------------|-----------------------------------------------------------------------------------------------------|-------------------------------------------------------------------------------------------------------------------------------------------------------------------------------------------------------------------------------------------------------------------------------------------------------|
| <b>Dahl-Petersen, 2013</b>  | Med Sci Sports Exerc. 2013 Apr;45(4):728-36                               | N=1508, ≥18 years, Inuit in Greenland | Actiheart (CamNtech Ltd, Cambridge, UK)                         | 4 days, at least 2 days of valid data                                                                                                            | IPAQ long form                                                                                      | Spearman correlation coefficient between IPAQ and accelerometer<br><b>Total physical activity</b><br>Men: 0.33, P<0.001<br>Women: 0.28, P<0.001<br><b>Moderate intensity</b><br>Men: 0.25, P<0.001<br>Women: 0.19, P<0.001<br><b>Vigorous intensity</b><br>Men: 0.27, P<0.001<br>Women: 0.17, P<0.001 |
| <b>Segura-Jiménez, 2013</b> | Clin Exp Rheumatol. 2013 Nov-Dec;31(6 Suppl 79):S94-101. Epub 2013 Dec 2. | N=123 spanish women with fibromyalgia | SenseWear Pro <sub>3</sub> Armband (Body Media, Pittsburgh, PA) | Worn on right upper arm over triceps, 9 consecutive days, 1-min intervals, first and last days excluded to minimize reactivity, at least 7 days, | Modified International Physical Activity Questionnaire (IPAQ), 2 items added about time spent lying | Pearson correlation coefficient IPAQ-accelerometer<br>r= -0.12 P= 0.18 (sitting)<br>r= 0.06 P= 0.54 (moderate PA)<br>r= 0.04 P= 0.63 (vigorous PA)<br>r=0.11 P= 0.21 (total PA)                                                                                                                       |
| <b>Gabriel, 2013</b>        | Menopause. Feb 2013; 20(2): 152–161.                                      | N=148 women, 42-50 years,             | ActiGraph GT1M (Pensacola, Florida)                             | On dominant hip, 7 consecutive days, 24 hours, at least 10 hours/day                                                                             | Modifiable Activity Questionnaire (MAQ)                                                             | Pearson correlation coefficient questionnaire-accelerometer<br>r= 0.39, P<0.001 (total PA)<br>r= 0.07, n.s.<br>r=0.38, P<0.001<br>r=0.42, P<0.001                                                                                                                                                     |

**Additional File 1. Summary of correlations of physical activity data assessed by questionnaires and accelerometers with respect to Gender (continued)**

| <i>Study</i>       | <i>Journal</i>                             | <i>No. of Participants</i> | <i>Accelerometer used</i>                 | <i>Accelerometer wear method</i>                                                                                                      | <i>Questionnaire used in investigation</i>                                                                                                                                                                                                                  | <i>Results</i>                                                                                                                                                                                                                                                                                                                                                                                |
|--------------------|--------------------------------------------|----------------------------|-------------------------------------------|---------------------------------------------------------------------------------------------------------------------------------------|-------------------------------------------------------------------------------------------------------------------------------------------------------------------------------------------------------------------------------------------------------------|-----------------------------------------------------------------------------------------------------------------------------------------------------------------------------------------------------------------------------------------------------------------------------------------------------------------------------------------------------------------------------------------------|
| <b>Sabia, 2014</b> | Am J Epidemiol. 2014 Mar 15;179(6):781-90. | n= 3,975, 60-83 years      | GeneActiv; Activinsights Ltd., Cambs, UK) | Wrist-worn, on non-dominant wrist, 9 consecutive days, 24 hours, at least 2 weekdays and 2 weekend days for at least 16 hours per day | Modified version of the Minnesota Leisure Time Physical Activity Questionnaire, 20 items on amount of time spent in: walking, sports, gardening, housework, do-it-yourself activity (building, repairing,...), 2 open-ended questions on "other activities" | Spearman correlation questionnaire-accelerometer (total PA)<br><br>Total: $\rho=0.33$ (95% CI: 0.30-0.36)<br>Women: $\rho= 0.32$ (95% CI: 0.26-0.37)<br>Men: $\rho= 0.33$ (95% CI: 0.30-0.37)<br>60-65 years: $\rho=0.30$ (95% CI: 0.25-0.35)<br>66-70 years: $\rho=0.36$ (95% CI: 0.31-0.41)<br>71-75 years: $\rho=0.34$ (95% CI: 0.27-0.40)<br>76-83 years: $\rho=0.26$ (95% CI: 0.20-0.33) |

**Abbreviations:** IPAQ, International Physical Activity Questionnaire; Acc, accelerometry; h, hours; d, days; BWHS, Black Women’s Health Study; Qu, Questionnaire; PYTPYQ, past year total physical activity questionnaire; PA, physical activity; PAQ-EJ, physical activity questionnaire for elderly Japanese; MET, metabolic equivalent of task; PASE, physical activity scale for the elderly; EPIC, European Prospective Investigation into Cancer and Nutrition; EE, energy expenditure; GPAQ, Global Physical Activity Questionnaire; MVPA, moderate-vigorous physical activity; SP2PAQ, Singapore Prospective Study Program Physical Activity Questionnaire; IMS, Indian Migration Study
