# Supplementary material for: Accelerometry and physical activity questionnaires - a systematic review
Source: Springer Nature journal article supplement (doi:10.1186/s12889-016-3172-0), 2016-06-16
Supplement: MOESM3 [file 10267662]

---

**Additional File 3. Summary of correlations of physical activity data assessed by questionnaires and accelerometers with respect to Age**

---

| <i>Study</i>              | <i>Journal</i>                                               | <i>No. of Participants</i>                                                           | <i>Accelerometer used</i>                                                         | <i>Accelerometer wear method</i>                                                                                                                  | <i>Questionnaire used in investigation</i>                                                                                                                                                                                        | <i>Results</i>                                                                                                                                                                                                                                                                                                                                                       |
|---------------------------|--------------------------------------------------------------|--------------------------------------------------------------------------------------|-----------------------------------------------------------------------------------|---------------------------------------------------------------------------------------------------------------------------------------------------|-----------------------------------------------------------------------------------------------------------------------------------------------------------------------------------------------------------------------------------|----------------------------------------------------------------------------------------------------------------------------------------------------------------------------------------------------------------------------------------------------------------------------------------------------------------------------------------------------------------------|
| <b>Craig, 2003</b>        | Med Sci Sports Exerc. 2003 Aug;35(8):1381-95.                | n= 744 (IPAQ long form), n= 781 (IPAQ short form), 12 countries, 18-65 years         | Computer Science and Application's Inc. (Shalimar, FL) accelerometer (model 7164) | 7 days, between 2 IPAQ measurements, 1 min epochs, min 5 days, min 600 min/day                                                                    | IPAQ, short form (9 items) -> estimated time spent sitting per week, long form (31 items) -> estimated total time spent in occupational, transport, household, and leisure related physical activity, total time sitting per week | <b>Correlation IPAQ (long) - Acc</b><br>p= 0.33, 95% CI 0.26-0.39 (pooled)<br><b>Correlation IPAQ (short) - Acc</b><br>p= 0.30, 95% CI 0.23-0.36 (pooled)                                                                                                                                                                                                            |
| <b>Friedenreich, 2006</b> | Am J Epidemiol . 2006 May 15;163(10):959-70. Epub 2006 Mar 8 | n= 154, 35-65 years, residence in Calgary Health Region of Alberta, Canada           | MTI ActiGraph (Manufacturing Technology Inc., Fort Walton Beach, FL, USA)         | 7 days during waking hours, 4 1-week periods within 1 year, 12 weeks apart to cover all seasons during waking hours, min 3 days, min 10 hours/day | PYTPYQ (past year total physical activity qu), occupational, household, recreational activity, at baseline, 9 weeks after baseline, after 12 months                                                                               | Spearman rank<br><b>Correlation PYTPAQ - Acc (total PA)</b><br>r= 0.43 (age < 50) p <0.001<br>r= 0.05 (age ≥ 50)                                                                                                                                                                                                                                                     |
| <b>Yasunaga, 2007</b>     | Journal of Aging and Physical Activity, 2007, 15, 398-411    | n= 147 Japanese, 65-85 years                                                         | Modified Kenz Lifecorder, Suzuken Co., Ltd., Nagoya, Aichi, Japan                 | 1 month, every 4 s, attached to waist belt on either right or left side of body, 1 month before PAQ administration, during waking hours           | PAQ-EJ (physical activity questionnaire for elderly Japanese), frequency and duration during a typical week in the preceding month                                                                                                | rank-ordered Spearman correlation<br><b>Correlation subtotal PAQ-EJ (lower intensity activities) vs. month averaged record for daily PA &lt;3METs (Acc)</b><br>r= 0,28<br><b>Correlation PAQ-EJ (total score) vs. month averaged daily step count</b><br>r= 0.41<br><b>Correlation of PAQ-EJ (higher intensity activities) vs. Activity ≥3 METs (Acc)</b><br>r= 0,53 |
| <b>Hagiwara, 2008</b>     | Geriatr Gerontol Int. 2008 Sep;8(3):143-51.                  | n= 325, 65+ years, no cognitive disorder or deficiency in activities of daily living | Life Corder; Suzuken, Tokyo, Japan                                                | 3 days, after filling out PA questionnaire, during waking hours                                                                                   | PASE (physical activity scale for the elderly), leisure time, household, work-related, past 7 days                                                                                                                                | Spearman rank correlation<br><b>Correlation PASE-Acc steps:</b><br>total: r= 0.17 (P= 0.01)<br>men: r= 0.38 p <0,001<br>women: r= -0.02<br><b>Correlation PASE-Acc Energy expenditure:</b><br>total: r= 0.16 P= 0.02<br>men: r= 0.35 p= 0,001<br>women: r= 0.01                                                                                                      |

---

**Additional File 3. Summary of correlations of physical activity data assessed by questionnaires and accelerometers with respect to Age (continued)**

| <b>Study</b>        | <b>Journal</b>                                                     | <b>No. of Participants</b>             | <b>Accelerometer used</b>                                                 | <b>Accelerometer wear method</b>                                                                                                                                                                                   | <b>Questionnaire used in investigation</b>                                                                                                                                                                                                                                                                | <b>Results</b>                                                                                                                                                                                                                                                                                                                                                                                                                                                                                                                                                                                                                                                                                                               |
|---------------------|--------------------------------------------------------------------|----------------------------------------|---------------------------------------------------------------------------|--------------------------------------------------------------------------------------------------------------------------------------------------------------------------------------------------------------------|-----------------------------------------------------------------------------------------------------------------------------------------------------------------------------------------------------------------------------------------------------------------------------------------------------------|------------------------------------------------------------------------------------------------------------------------------------------------------------------------------------------------------------------------------------------------------------------------------------------------------------------------------------------------------------------------------------------------------------------------------------------------------------------------------------------------------------------------------------------------------------------------------------------------------------------------------------------------------------------------------------------------------------------------------|
| <b>Cust, 2009</b>   | Epidemiology. 2009 May;20(3):433-41.                               | n= 177, 50-65 years                    | ActiGraph (model 7164, Health One Technology, Fort Walton Beach, FL, USA) | 3 separate 7 consecutive day-periods (each 14 weeks apart), on right hip, attached to elastic belt, during waking hours, 1 min epochs, ≥ 20 min of consecutive zero counts = non-wear time, min 4 days, min 10 h/d | EPIC Past-Year Questionnaire (PA, METh/week), assesses occupational, leisure, and household PA, IPAQ (short form, past 7 days) (confidence rating: self-rated confidence in recalling past physical activity)                                                                                             | Correlation<br><b>Acc METh/wk - EPIC :</b><br>r= 0.30 (0.10-0.48) high confidence ( <u>total PA</u> )<br>r= 0.22 (0.02-0.41) low confidence<br>r= 0.22 (0.00-0.43) high confidence ( <u>vigorous PA, METh/week</u> )<br>r= 0.11 (-0.10-0.30) low confidence<br><b>Acc METh/wk - IPAQ (METh/week):</b><br>r= 0.26 (0.04-0.45) high confidence ( <u>total PA</u> )<br>r= 0.27 (0.07-0.46) low confidence<br>r= 0.30 (0.09-0.49) high confidence ( <u>moderate+vigorous PA</u> )<br>r= 0.27 (0.07-0.45) low confidence<br>r= 0.35 (0.08-0.55) high confidence ( <u>moderate PA</u> )<br>r= 0.01 (-0.17-0.20) low confidence<br>r= 0.28 (0.05-0.49) high confidence ( <u>vigorous PA</u> )<br>r= 0.32 (0.13-0.48) low confidence |
| <b>Harris, 2009</b> | <u>Med Sci Sports Exerc.</u> 2009 Jul;41(7):1392-402               | n= 234, ≥ 65 years                     | GT1M (ActiGraph) Yamax Digi-walker SW-200 pedometer (over hip, 7 days)    | 7 days, over hip on a belt, all day, <5d= exclusion, uniaxial, 30 Hz, 5s epochs                                                                                                                                    | 17-item Zuthpen PAQ (EE in kcals), past week, month, usually, added light/heavy household activities bc Zuthpen doesn't ask, added dog walking                                                                                                                                                            | <b>Correlation Zuthpen (modified) - accelerometer activity counts:</b><br>r= 0.34, P <0.001<br><b>Correlation Zuthpen (traditional) (without housework included)</b><br>r= 0.35, P<0.001<br><b>Correlation Zuthpen - Acc/pedo. step counts:</b><br>r=0.35 and r= 0.36, P<0.001                                                                                                                                                                                                                                                                                                                                                                                                                                               |
| <b>Trinh, 2009</b>  | Journal of Physical Activity and Health, 2009, 6(Suppl 1), S46-S53 | n= 169 adults, Vietnamese, 25-64 years | ActiGraph model 7164, GT1M                                                | 7 consecutive days, during daytime, before the first and last GPAQ assessment, 20 consecutive minutes of zero counts were considered as non-wear time, min 10h/day, min 5 valid days                               | GPAQ (Global Physical Activity Questionnaire), assesses frequency and duration of PA during work (including household), transportation, and leisure time as well as time spent sitting or reclining during a usual week, twice during dry season (2 weeks apart), twice during wet season (2 weeks apart) | Spearman correlation<br><b>Correlation GPAQ - Accelerometer</b><br><u>dry season</u> <u>wet season</u><br>r= 0.17              r= 0.09      (moderate PA)<br>r= -0.03            r= 0.02      (vigorous PA)<br>r= 0.19              r= 0.09      (total score vs. MVPA Acc)<br>r= 0.33              r= 0.19      (total score vs. Total counts)<br>r= 0.22              r= 0.31      (GPAQ sitting & reclining time vs. Sedentary time)                                                                                                                                                                                                                                                                                      |

**Additional File 3. Summary of correlations of physical activity data assessed by questionnaires and accelerometers with respect to Age (continued)**

| <i>Study</i>       | <i>Journal</i>                                        | <i>No. of Participants</i>                        | <i>Accelerometer used</i>                                           | <i>Accelerometer wear method</i>                                                                                                                                                                                                                                    | <i>Questionnaire used in investigation</i>                                                                                                       | <i>Results</i>                                                                                                                                                                                                                                                                                                                                                                                                                                                                                                                                                                                                  |
|--------------------|-------------------------------------------------------|---------------------------------------------------|---------------------------------------------------------------------|---------------------------------------------------------------------------------------------------------------------------------------------------------------------------------------------------------------------------------------------------------------------|--------------------------------------------------------------------------------------------------------------------------------------------------|-----------------------------------------------------------------------------------------------------------------------------------------------------------------------------------------------------------------------------------------------------------------------------------------------------------------------------------------------------------------------------------------------------------------------------------------------------------------------------------------------------------------------------------------------------------------------------------------------------------------|
| <b>Clark, 2011</b> | <u>Med Sci Sports Exerc.</u> 2011 Oct;43(10):1907-12. | n= 121 full-time workers, 18-65 years, ambulatory | GT1M<br>ActiGraph                                                   | 7 days, over right iliac crest, during waking hours, 1-min epochs, min 4 days                                                                                                                                                                                       | IPAQ, after 7d accelerometer measurement                                                                                                         | <p><b>Correlation workplace sitting (self-reported) vs. sedentary time at workplace (Acc)</b><br/> <u>total group</u><br/>           r= 0.39, 95% CI = 0.22-0.53 (Pearson correlation)<br/>           r= 0.29, 95% CI = 0.11-0.44 (Spearman rank-order correlation)</p> <p><b>Correlation workplace breaks in sitting time (self-reported) vs. breaks per sedentary hour (Acc)</b><br/> <u>total group</u><br/>           r= 0.26, 95% CI = 0.11-0.44 (Spearman rank-order correlation)</p>                                                                                                                     |
| <b>Lee, 2011</b>   | Int J Behav Nutr Phys Act. 2011 Aug 1;8:81.           | n= 1270 (42.9 ± 14.4 years)                       | ActiGraph<br>GT1M                                                   | 4 consecutive days, around waist, 2 weekdays+2 weekend days, during waking time, first day always Thursday, Friday, Saturday), less than 600 mins of registered time/day-> invalid, 1 min epoch, moderate(3-5,99MET/1952-5724counts), vigorous (≥6METs/≥5725counts) | IPAQ-C, short form (9items vs. 31items long form), equivalent psychometric properties to the long form                                           | <p>Spearman correlation</p> <p><b>Correlation IPAQ-C (moderate PA) vs. Acc (min in moderate PA)</b><br/>           r= 0.05 <u>≤29 years</u>; r= 0.09 <u>30-49 years</u>; r=0.12, P&lt;0.05 <u>≥50 years</u></p> <p><b>Correlation IPAQ-C (vigorous PA) vs. Acc (min in vigorous PA)</b><br/>           r= 0.21, P&lt;0.001 <u>≤29 years</u>; r= 0.12, P&lt;0.01 <u>30-49 years</u>; r=0.14, P&lt;0.01 <u>≥50 years</u></p> <p><b>Correlation IPAQ-C (total MET) vs. Acc (counts/h)</b><br/>           r= 0.04 <u>≤29 years</u>; r= 0.19, P&lt;0.001 <u>30-49 years</u>; r=0.25, P&lt;0.001 <u>≥50 years</u></p> |
| <b>Nang, 2011</b>  | <u>BMC Med Res Methodol.</u> 2011 Oct 13;11:141       | 152 adults (21+ years)                            | Actical physical activity monitor (Mini Mitter Co., Inc., Bend, OR) | 5 consecutive days, right hip with elastic belts, 3 weekdays, 2 weekend days, 15sec epochs, converted to 1min epochs for analysis of energy expenditure                                                                                                             | IPAQ, 120 participants before measurement and immediately afterwards, SP2PAQ (Singapore Prospective Study Program PAQu), 43 the other way around | <p><b>Correlation IPAQ-Acc:</b><br/> <u>age ≤ 40:</u><br/>           0.08/ 0.09 corrected (moderate),<br/>           0.30/ 0.52 corrected (vigorous), p&lt;0.05</p> <p><u>age &gt;40:</u><br/>           r= 0.21/ 0.24 corrected (moderate),<br/>           r= -0.07/ -0.01 corrected (vigorous)</p> <p><b>Correlation SP2PAQ-Acc:</b><br/> <u>age ≤ 40:</u><br/>           r= 0.21/ 0.24 corrected, p&lt; 0.05 (moderate),<br/>           r= 0.48, p&lt; 0.0001/ 0.83 corrected (vigorous), p&lt;0.05</p>                                                                                                      |

**Additional File 3. Summary of correlations of physical activity data assessed by questionnaires and accelerometers with respect to Age (continued)**

| <i>Study</i>                          | <i>Journal</i>                                                     | <i>No. of Participants</i>                  | <i>Accelerometer used</i>                                                                | <i>Accelerometer wear method</i>                                                                                                                                  | <i>Questionnaire used in investigation</i>                                                                                                                   | <i>Results</i>                                                                                                                                                                                                                                                                                                                                                                                                                                                                                                                               |
|---------------------------------------|--------------------------------------------------------------------|---------------------------------------------|------------------------------------------------------------------------------------------|-------------------------------------------------------------------------------------------------------------------------------------------------------------------|--------------------------------------------------------------------------------------------------------------------------------------------------------------|----------------------------------------------------------------------------------------------------------------------------------------------------------------------------------------------------------------------------------------------------------------------------------------------------------------------------------------------------------------------------------------------------------------------------------------------------------------------------------------------------------------------------------------------|
| <b>Nang, 2011</b><br><i>continued</i> | <u>BMC Med Res Methodol.</u><br>2011 Oct<br>13:11:141              | 152 adults<br>(21+ years)                   | Actical physical activity monitor (Mini Mitter Co., Inc., Bend, OR)                      | 5 consecutive days, right hip with elastic belts, 3 weekdays, 2 weekend days, 15sec epochs, converted to 1min epochs for analysis of energy expenditure           | IPAQ, 120 participants before measurement and immediately afterwards, SP2PAQ (Singapore Prospective Study Program PAQu), 43 the other way around             | <u>age &gt;40:</u><br>r= 0.27/ 0.30 corrected (moderate);<br>r= 0.48, p< 0.0015/ 0.85 corrected (vigorous)<br>*corrected: for within-person variation in acc measurement                                                                                                                                                                                                                                                                                                                                                                     |
| <b>Tomioka, 2011</b>                  | J Epidemiol.<br>2011 Nov<br>5;21(6):459-65. Epub<br>2011 Sep<br>24 | 325 (164 men,<br>161 women),<br>>=65 years, | Kenz Lifecorder PLUS, Suzuken Co., Ltd, Nagoya, Japan                                    | Left or right hip, on waist belt, ≤ 2 weeks (preferably 4 weeks), starting on day after 1st IPAQ, 2nd IPAQ on 14th day of accelerometer wear, during waking hours | IPAQ short form, twice, 2 weeks apart, 2 different sets of MET values: 1. original IPAQ values, 2. modified for use with elderly                             | Spearman correlation<br><b>Acc (total PA in METmin/week) vs. IPAQ (total PA in METmin/week)</b><br><u>65-74: r= 0.42 men, 0.49 women</u><br><u>75-89: r= 0.53 men, 0.49 women all P&lt; 0.01</u><br><b>Acc (total PA in METmin/week) vs. IPAQ (vigorous PA min/week)</b><br><u>65-74: r= 0.25 men, P&lt; 0.05, 0.12 women</u><br><u>75-89: r= 0.17 men, 0.17 women</u><br><b>Acc (total PA in METmin/week) vs. IPAQ (moderate PA min/week)</b><br><u>65-74: r= 0.26 men, P&lt; 0.05, 0.13 women</u><br><u>75-89: r= 0.05 men, 0.03 women</u> |
| <b>Hekler, 2012</b>                   | J Phys Act Health.<br>2012<br>Feb;9(2):22<br>5-36.                 | N=850, ≥66<br>years,                        | ActiGraph, model 7164 and 71256 (Manufacturing Technology Incorporated, Fort Walton, FL) | 7 days, during waking hours                                                                                                                                       | Modified Community Health Activities Model Program for Seniors physical activity questionnaire (CHAMPS), past 4 weeks, at least 5 days, at least 8 hours/day | Spearman rank order correlations<br>CHAMPS vs. accelerometer<br>Low-light physical activity ρ= 0.06<br>High-light physical activity ρ= 0.27, P<0.0001<br>MVPA ρ= 0.37, P<0.0001<br>Total activity ρ=0.38, P<0.0001                                                                                                                                                                                                                                                                                                                           |

**Additional File 3. Summary of correlations of physical activity data assessed by questionnaires and accelerometers with respect to Age (continued)**

| <i>Study</i>       | <i>Journal</i>                             | <i>No. of Participants</i> | <i>Accelerometer used</i>                 | <i>Accelerometer wear method</i>                                                                                                      | <i>Questionnaire used in investigation</i>                                                                                                                                                                                                                 | <i>Results</i>                                                                                                                                                                                                                                                                                                                                                                                |
|--------------------|--------------------------------------------|----------------------------|-------------------------------------------|---------------------------------------------------------------------------------------------------------------------------------------|------------------------------------------------------------------------------------------------------------------------------------------------------------------------------------------------------------------------------------------------------------|-----------------------------------------------------------------------------------------------------------------------------------------------------------------------------------------------------------------------------------------------------------------------------------------------------------------------------------------------------------------------------------------------|
| <b>Sabia, 2014</b> | Am J Epidemiol. 2014 Mar 15;179(6):781-90. | n= 3,975, 60-83 years      | GeneActiv; Activinsights Ltd., Cambs, UK) | Wrist-worn, on non-dominant wrist, 9 consecutive days, 24 hours, at least 2 weekdays and 2 weekend days for at least 16 hours per day | Modified version of the Minnesota Leisure Time Physical Activity Questionnaire, 20 items on amount of time spent in: walking, sports, gardening, housework, do-it-yourself activity (building, repairing,..), 2 open-ended questions on "other activities" | Spearman correlation questionnaire-accelerometer (total PA)<br><br>Total: $\rho=0.33$ (95% CI: 0.30-0.36)<br>Women: $\rho= 0.32$ (95% CI: 0.26-0.37)<br>Men: $\rho= 0.33$ (95% CI: 0.30-0.37)<br>60-65 years: $\rho=0.30$ (95% CI: 0.25-0.35)<br>66-70 years: $\rho=0.36$ (95% CI: 0.31-0.41)<br>71-75 years: $\rho=0.34$ (95% CI: 0.27-0.40)<br>76-83 years: $\rho=0.26$ (95% CI: 0.20-0.33) |

**Abbreviations:** IPAQ, International Physical Activity Questionnaire; Acc, accelerometry; PYTPYQ, past year total physical activity questionnaire; PA, physical activity; BWHS, Black Women's Health Study; Qu, Questionnaire; PAQ-EJ, physical activity questionnaire for elderly Japanese; MET, metabolic equivalent of task; PASE, physical activity scale for the elderly; EPIC, European Prospective Investigation into Cancer and Nutrition; EE, energy expenditure; GPAQ, Global Physical Activity Questionnaire; MVPA, moderate-vigorous physical activity; SP2PAQ, Singapore Prospective Study Program Physical Activity Questionnaire
